# Supplementary material for: Heterogeneity of tumor immune microenvironment in malignant and metastatic change in LUAD is revealed by single-cell RNA sequencing
Source: Aging (Albany NY). 2023 Jun 16;15(12):5339–54. doi: 10.18632/aging.204752 (PMC10333068; doi:10.18632/aging.204752)
Supplement: Supplementary Table 2 [file aging-15-204752-s002.xlsx]

## Sheet: Sheet1
Supplementary Table 2. Marker genes in each cell type.
log2FC	P.val.adj	Gene	Group	celltype
2.08135	0	HSP90AA1	T.vs.N	Memory T cell
2.4968	0	HSPA1A	T.vs.N	Memory T cell
1.73326	5.53714e-269	HSP90AB1	T.vs.N	Memory T cell
2.06077	1.87091e-251	HSPH1	T.vs.N	Memory T cell
1.96878	7.34562e-242	DNAJB1	T.vs.N	Memory T cell
1.95403	9.91277e-241	HSPA1B	T.vs.N	Memory T cell
1.647	1.07854e-226	HSPE1	T.vs.N	Memory T cell
1.51501	2.11583e-224	HSPA8	T.vs.N	Memory T cell
1.75537	4.27096e-208	HSPD1	T.vs.N	Memory T cell
1.55708	2.2916e-188	DNAJA1	T.vs.N	Memory T cell
1.42104	6.21954e-182	UBB	T.vs.N	Memory T cell
2.15367	8.12806e-170	IGKC	T.vs.N	Memory T cell
1.55956	5.34883e-138	IGHA1	T.vs.N	Memory T cell
1.30144	1.13101e-118	CACYBP	T.vs.N	Memory T cell
1.36538	1.53006e-116	JUN	T.vs.N	Memory T cell
1.51712	1.20287e-113	HSPA8	T.vs.M	Memory T cell
-2.0513	7.50457e-101	IGKC	N.vs.M	Memory T cell
1.48672	5.70819e-97	HSPA1A	T.vs.M	Memory T cell
1.44121	1.28667e-90	NR4A1	T.vs.N	Memory T cell
1.16182	1.14969e-88	HSP90AA1	T.vs.M	Memory T cell
1.06548	4.47738e-85	DEDD2	T.vs.N	Memory T cell
1.01508	1.80881e-79	DNAJB6	T.vs.N	Memory T cell
1.06733	6.60274e-73	HSP90AB1	T.vs.M	Memory T cell
1.18196	1.92784e-72	CHORDC1	T.vs.N	Memory T cell
1.03968	5.52222e-70	FKBP4	T.vs.N	Memory T cell
1.35005	2.13205e-68	EGR1	T.vs.N	Memory T cell
1.04466	1.33108e-67	SQSTM1	T.vs.N	Memory T cell
1.40859	1.61696e-59	HSPA6	T.vs.N	Memory T cell
1.58876	1.88897e-59	SCGB3A1	T.vs.M	Memory T cell
1.05634	1.19135e-57	SCGB3A1	T.vs.N	Memory T cell
1.40827	3.07131e-57	JUN	T.vs.M	Memory T cell
1.05822	1.43803e-55	HSPH1	T.vs.M	Memory T cell
1.19579	1.85571e-52	ANXA1	N.vs.M	Memory T cell
1.02255	4.99166e-52	SERPINH1	T.vs.N	Memory T cell
1.3729	1.19854e-50	SCGB1A1	T.vs.M	Memory T cell
1.03711	2.8511e-48	VIM	N.vs.M	Memory T cell
1.45444	1.75096e-45	SCGB1A1	N.vs.M	Memory T cell
1.07591	1.03781e-44	TUBA4A	T.vs.M	Memory T cell
1.06543	1.31937e-42	TUBA1A	T.vs.M	Memory T cell
1.34538	1.19524e-32	LMNA	N.vs.M	Memory T cell
1.17683	1.33859e-32	EGR1	T.vs.M	Memory T cell
1.25635	1.51733e-29	LMNA	T.vs.M	Memory T cell
1.05903	9.40946e-27	ANKRD37	T.vs.M	Memory T cell
-1.01007	1.05733e-25	HSPA1A	N.vs.M	Memory T cell
-1.13664	4.08635e-22	AC090498.1	T.vs.M	Memory T cell
-1.36612	1.68156e-21	HSPE1	N.vs.M	Memory T cell
-1.16805	2.2682e-16	DNAJB1	N.vs.M	Memory T cell
-1.06844	5.51394e-15	HSPA1B	N.vs.M	Memory T cell
1.29359	5.81844e-15	HSPA6	T.vs.M	Memory T cell
-1.38792	7.9237e-15	CCL4	T.vs.N	Memory T cell
-1.00255	6.72437e-13	HSPH1	N.vs.M	Memory T cell
-1.13542	3.03243e-12	RGS1	N.vs.M	Memory T cell
-2.28422	2.18265e-08	MT2A	N.vs.M	Memory T cell
-2.40329	2.77857e-08	MT2A	T.vs.M	Memory T cell
-3.20086	6.30918e-173	SERPINF1	T.vs.M	Epithelial cell
-3.05617	1.2425e-168	IGFBP6	T.vs.M	Epithelial cell
-3.51519	1.54031e-167	SOD3	T.vs.M	Epithelial cell
-5.04977	3.5328e-162	MDK	N.vs.M	Epithelial cell
-1.97713	5.08001e-146	CHRNA5	T.vs.M	Epithelial cell
-3.3667	2.71929e-143	AKR1C2	N.vs.M	Epithelial cell
-3.19457	6.78796e-143	IGFBP6	N.vs.M	Epithelial cell
-2.84823	1.92163e-142	VMO1	T.vs.M	Epithelial cell
-1.82203	5.1018e-135	FAM217B	T.vs.M	Epithelial cell
-3.09993	1.85052e-129	SERPINF1	N.vs.M	Epithelial cell
-3.37302	1.86863e-129	IGFBP2	N.vs.M	Epithelial cell
-3.03029	2.55724e-128	VMO1	N.vs.M	Epithelial cell
-3.45346	3.35334e-127	MDK	T.vs.M	Epithelial cell
-6.15848	3.18716e-126	PGC	N.vs.M	Epithelial cell
-2.86136	7.35359e-121	PCP4	N.vs.M	Epithelial cell
2.09896	1.2778e-118	TMSB10	T.vs.N	Epithelial cell
-2.56205	8.4362e-117	CTSZ	T.vs.M	Epithelial cell
-2.67902	3.5542e-116	TIMP3	T.vs.M	Epithelial cell
-3.68134	2.37333e-113	PGC	T.vs.M	Epithelial cell
-1.91624	5.68508e-113	BST2	N.vs.M	Epithelial cell
-2.24201	9.56169e-112	NQO1	N.vs.M	Epithelial cell
-1.75008	1.52959e-111	LGSN	N.vs.M	Epithelial cell
-1.8282	7.6531e-111	FAM217B	N.vs.M	Epithelial cell
-1.98055	7.77358e-111	CHRNA5	N.vs.M	Epithelial cell
-1.11002	8.67843e-111	ATP6V1C2	T.vs.M	Epithelial cell
-2.55783	1.84264e-110	PDCD6	N.vs.M	Epithelial cell
-3.17029	1.66364e-108	WFDC2	N.vs.M	Epithelial cell
-2.63887	7.90313e-108	CTSZ	N.vs.M	Epithelial cell
2.17526	7.27167e-107	IGKC	T.vs.N	Epithelial cell
-2.71694	4.39102e-106	CLU	T.vs.M	Epithelial cell
-1.81542	1.01589e-105	SLC12A7	N.vs.M	Epithelial cell
-2.23791	4.43372e-105	MT.ND6	N.vs.M	Epithelial cell
1.40648	5.62807e-105	RPL39	T.vs.N	Epithelial cell
-1.69912	6.61708e-105	ITM2C	N.vs.M	Epithelial cell
-1.35357	2.08929e-104	SLC16A14	T.vs.M	Epithelial cell
-2.09046	2.23926e-104	PDCD6	T.vs.M	Epithelial cell
-2.08111	2.34458e-104	PCP4	T.vs.M	Epithelial cell
-1.65807	8.91524e-104	CIT	N.vs.M	Epithelial cell
-2.93228	2.13941e-103	SOD3	N.vs.M	Epithelial cell
-2.14044	8.88908e-103	AKR1C2	T.vs.M	Epithelial cell
-2.54164	9.81886e-103	GNAS	N.vs.M	Epithelial cell
-2.3739	7.09853e-102	LY6E	T.vs.M	Epithelial cell
-2.20669	1.3623e-101	GNAS	T.vs.M	Epithelial cell
2.28917	1.06493e-98	TPT1	T.vs.M	Epithelial cell
-1.11219	9.00122e-98	PKP1	T.vs.M	Epithelial cell
-1.58245	2.08374e-97	RAMP1	N.vs.M	Epithelial cell
-2.20196	2.28772e-97	MSLN	N.vs.M	Epithelial cell
-1.84498	3.17765e-97	CLPTM1L	N.vs.M	Epithelial cell
-1.98467	7.65135e-97	MT.ND6	T.vs.M	Epithelial cell
-2.38264	7.95327e-97	HMGB3	N.vs.M	Epithelial cell
-1.60049	1.60518e-96	CPE	N.vs.M	Epithelial cell
-2.60917	3.66773e-96	IGFBP5	T.vs.M	Epithelial cell
-1.50287	3.87828e-96	HELZ2	T.vs.M	Epithelial cell
-2.36126	7.7807e-96	IGFBP2	T.vs.M	Epithelial cell
-1.33739	6.17187e-95	PCSK1N	T.vs.M	Epithelial cell
-2.10789	3.37723e-93	HSP90B1	N.vs.M	Epithelial cell
-1.41843	5.3109e-93	SLC16A14	N.vs.M	Epithelial cell
-1.15085	1.94472e-92	ATP6V1C2	N.vs.M	Epithelial cell
-1.77975	1.9548e-90	GEM	N.vs.M	Epithelial cell
1.39688	4.19822e-90	RPS29	T.vs.N	Epithelial cell
-2.55807	1.81532e-89	IFI27	N.vs.M	Epithelial cell
-1.3204	2.43312e-89	COL9A2	T.vs.M	Epithelial cell
-1.62834	1.58326e-87	RPS21	N.vs.M	Epithelial cell
1.19527	2.50822e-86	RPL38	T.vs.N	Epithelial cell
-1.52342	3.35547e-86	CLPTM1L	T.vs.M	Epithelial cell
-1.5255	3.64666e-86	HELZ2	N.vs.M	Epithelial cell
1.44792	5.87428e-86	IGHA1	T.vs.N	Epithelial cell
-1.35336	1.56619e-85	SDHA	T.vs.M	Epithelial cell
-1.07724	3.63371e-85	HSD17B13	T.vs.M	Epithelial cell
4.98499	7.11997e-84	SPINK1	T.vs.N	Epithelial cell
-1.42965	1.1294e-83	LGSN	T.vs.M	Epithelial cell
1.21105	2.03095e-83	RPL37	T.vs.N	Epithelial cell
-1.59898	2.48806e-83	CRLF1	N.vs.M	Epithelial cell
-1.26396	3.84535e-83	STX16	T.vs.M	Epithelial cell
2.21863	4.50372e-83	B2M	T.vs.M	Epithelial cell
-2.43866	5.89308e-83	CLU	N.vs.M	Epithelial cell
-1.91239	1.62569e-82	TXNRD1	N.vs.M	Epithelial cell
1.16378	5.42605e-82	RPL37A	T.vs.N	Epithelial cell
-1.682	4.63567e-81	SLC12A2	N.vs.M	Epithelial cell
-1.61895	6.23393e-81	BNIP3	T.vs.M	Epithelial cell
-1.43296	7.59791e-81	CRYAB	T.vs.M	Epithelial cell
-1.26253	2.08849e-80	MYO10	N.vs.M	Epithelial cell
2.01128	3.37842e-80	B2M	N.vs.M	Epithelial cell
-1.41152	7.04098e-80	2023-03-06	T.vs.M	Epithelial cell
-2.69978	1.12544e-79	IGFBP5	N.vs.M	Epithelial cell
-1.41073	1.28465e-79	SDHA	N.vs.M	Epithelial cell
-1.22904	1.38495e-79	ITM2C	T.vs.M	Epithelial cell
-4.95493	3.20201e-79	AGER	T.vs.N	Epithelial cell
-1.64194	6.17496e-79	PDIA4	N.vs.M	Epithelial cell
-1.97274	9.85824e-79	ADIRF	T.vs.N	Epithelial cell
-1.31822	1.23674e-78	PCSK1N	N.vs.M	Epithelial cell
-2.4249	1.25981e-78	ATP5E	N.vs.M	Epithelial cell
-1.27739	1.96533e-78	PCSK2	T.vs.M	Epithelial cell
-1.87358	2.6329e-78	S100P	N.vs.M	Epithelial cell
-1.33615	1.07603e-77	MARCKSL1	N.vs.M	Epithelial cell
1.2203	1.97979e-77	RPS21	T.vs.N	Epithelial cell
-1.43034	8.03615e-77	SLC12A7	T.vs.M	Epithelial cell
-1.1281	1.70376e-76	TFPI2	T.vs.M	Epithelial cell
1.50521	2.37554e-76	MARCKSL1	T.vs.N	Epithelial cell
1.50109	2.58075e-76	SMIM22	T.vs.N	Epithelial cell
1.70419	4.80783e-76	RPS20	T.vs.M	Epithelial cell
-1.22678	3.46304e-75	CIT	T.vs.M	Epithelial cell
-1.38164	2.34953e-74	PRELID3B	T.vs.M	Epithelial cell
-1.83223	2.53255e-74	AKR1C1	N.vs.M	Epithelial cell
-1.11764	1.26931e-73	PKP1	N.vs.M	Epithelial cell
-2.07253	2.39546e-73	IFI6	N.vs.M	Epithelial cell
-1.58752	2.46697e-73	HSPD1	N.vs.M	Epithelial cell
2.31484	2.94019e-73	HLA.B	T.vs.M	Epithelial cell
-1.5135	5.34923e-73	TAC4	N.vs.M	Epithelial cell
1.72587	5.91983e-73	RPS12	T.vs.M	Epithelial cell
-1.12272	7.40998e-73	MYO10	T.vs.M	Epithelial cell
-1.93206	1.00141e-72	NR4A1	N.vs.M	Epithelial cell
-1.26441	1.10549e-72	RAB31	T.vs.M	Epithelial cell
-1.32341	2.48497e-72	COL9A2	N.vs.M	Epithelial cell
-1.62429	3.61981e-72	TXNRD1	T.vs.M	Epithelial cell
-1.70609	3.64036e-72	ALPL	T.vs.M	Epithelial cell
-1.90483	4.00431e-72	ATP1B1	N.vs.M	Epithelial cell
1.61045	6.71592e-72	RPS28	T.vs.M	Epithelial cell
2.22949	8.51965e-72	TESC	T.vs.N	Epithelial cell
1.59631	3.65882e-71	MDK	T.vs.N	Epithelial cell
-4.67296	4.50416e-71	SFTPC	T.vs.N	Epithelial cell
-2.28793	8.78028e-71	PPDPF	N.vs.M	Epithelial cell
-1.5128	2.86538e-70	PSMA7	N.vs.M	Epithelial cell
-1.21184	4.12435e-70	TFPI2	N.vs.M	Epithelial cell
-1.78103	1.17971e-69	LY6E	N.vs.M	Epithelial cell
-1.99959	2.9359e-69	ALPL	N.vs.M	Epithelial cell
-1.85011	3.61988e-69	NEAT1	N.vs.M	Epithelial cell
1.69354	6.95339e-69	UBA52	T.vs.M	Epithelial cell
-1.12285	9.33501e-69	BASP1	N.vs.M	Epithelial cell
-1.43983	2.27552e-68	PRELID3B	N.vs.M	Epithelial cell
-1.08589	2.28348e-68	PPP1R14B	N.vs.M	Epithelial cell
-1.68501	5.21756e-68	HIST1H1C	T.vs.M	Epithelial cell
-1.03206	6.09312e-68	NELFCD	T.vs.M	Epithelial cell
-1.36059	1.1468e-67	CRLF1	T.vs.M	Epithelial cell
-1.58493	1.43053e-67	MANF	N.vs.M	Epithelial cell
-1.86735	1.49273e-67	KLK11	N.vs.M	Epithelial cell
-1.41732	5.0431e-67	FASN	T.vs.M	Epithelial cell
-3.61927	7.57335e-67	CAV1	T.vs.N	Epithelial cell
-1.59392	1.66035e-66	BNIP3	N.vs.M	Epithelial cell
-1.17548	2.87727e-66	KCNK1	N.vs.M	Epithelial cell
2.01963	6.4499e-66	CD24	T.vs.N	Epithelial cell
-1.52479	1.19536e-65	EPHX1	T.vs.M	Epithelial cell
1.39653	2.41289e-65	RPL38	T.vs.M	Epithelial cell
-2.12573	4.25585e-65	HSPA6	N.vs.M	Epithelial cell
-1.09922	4.48991e-65	POLR3H	T.vs.M	Epithelial cell
-1.44265	4.51143e-65	CD9	T.vs.N	Epithelial cell
4.45276	4.953e-65	S100P	T.vs.N	Epithelial cell
1.44206	3.27429e-64	RPL32	T.vs.M	Epithelial cell
1.11986	8.08645e-64	RPS27	T.vs.N	Epithelial cell
-1.50396	1.44707e-63	SPTSSA	T.vs.M	Epithelial cell
3.03669	1.93601e-63	FXYD3	T.vs.M	Epithelial cell
-1.48338	2.58447e-63	LPIN2	N.vs.M	Epithelial cell
1.03504	2.79479e-63	RPS19	T.vs.N	Epithelial cell
-1.19215	6.26917e-63	SESTD1	T.vs.M	Epithelial cell
-1.30134	1.40163e-62	PCSK2	N.vs.M	Epithelial cell
-1.02908	2.00768e-62	BASP1	T.vs.M	Epithelial cell
2.60298	2.7194e-62	TSPAN8	T.vs.N	Epithelial cell
2.56458	3.42669e-62	ANXA1	N.vs.M	Epithelial cell
-1.26177	3.67093e-62	NME4	N.vs.M	Epithelial cell
-1.2043	5.18944e-62	STX16	N.vs.M	Epithelial cell
-1.16116	5.41253e-62	UGDH	N.vs.M	Epithelial cell
-1.20674	5.59459e-62	EEF1A2	N.vs.M	Epithelial cell
-1.30411	5.62625e-62	OS9	T.vs.M	Epithelial cell
-1.12196	5.89782e-62	FAM3B	N.vs.M	Epithelial cell
-1.14842	1.10055e-61	BCAM	T.vs.M	Epithelial cell
1.00841	1.7271e-61	ATP5E	T.vs.N	Epithelial cell
-1.43818	2.43099e-61	WFDC2	T.vs.M	Epithelial cell
-1.66627	2.76325e-61	HMGB3	T.vs.M	Epithelial cell
-1.01066	9.27866e-61	CMBL	N.vs.M	Epithelial cell
-1.27244	1.32333e-60	2023-03-06	N.vs.M	Epithelial cell
-1.30748	1.79805e-60	CRELD2	T.vs.M	Epithelial cell
1.47997	2.02678e-60	RPS29	T.vs.M	Epithelial cell
1.17239	5.22321e-60	TCEB2	T.vs.N	Epithelial cell
2.18772	1.01583e-59	S100A10	T.vs.M	Epithelial cell
1.55195	1.24578e-59	HN1	T.vs.N	Epithelial cell
1.12491	3.18913e-59	MT.CO2	T.vs.N	Epithelial cell
-1.27402	4.35399e-59	TAC4	T.vs.M	Epithelial cell
-1.36174	5.84233e-59	MSLN	T.vs.M	Epithelial cell
1.15717	6.28079e-59	RPL34	T.vs.M	Epithelial cell
1.48501	7.57887e-59	GAPDH	T.vs.N	Epithelial cell
1.34352	1.01025e-58	HLA.A	T.vs.N	Epithelial cell
-1.13661	1.29791e-58	ERO1B	N.vs.M	Epithelial cell
-1.23086	1.44169e-58	BST2	T.vs.M	Epithelial cell
-1.38462	1.85249e-58	CRELD2	N.vs.M	Epithelial cell
-1.4703	2.44211e-58	PTP4A1	T.vs.M	Epithelial cell
1.9925	2.74915e-58	IFI27	T.vs.N	Epithelial cell
-2.48616	4.08443e-58	RTKN2	T.vs.N	Epithelial cell
1.03929	4.30365e-58	SERF2	T.vs.N	Epithelial cell
-3.77298	6.68422e-58	EMP2	T.vs.N	Epithelial cell
2.48615	7.151e-58	FXYD3	N.vs.M	Epithelial cell
-1.9332	1.13296e-57	UPK3B	T.vs.N	Epithelial cell
-1.37211	1.42101e-57	CNPY2	N.vs.M	Epithelial cell
1.33382	3.88423e-57	MIF	T.vs.N	Epithelial cell
-1.32198	5.08394e-57	HSP90B1	T.vs.M	Epithelial cell
-1.50741	5.64202e-57	PTP4A1	N.vs.M	Epithelial cell
2.14344	1.09849e-56	NUPR1	N.vs.M	Epithelial cell
-1.41648	1.20584e-56	ATP5E	T.vs.M	Epithelial cell
1.04356	2.42223e-56	RPLP2	T.vs.M	Epithelial cell
3.50102	2.19428e-55	MUC5AC	T.vs.N	Epithelial cell
-1.56927	2.83053e-55	PPDPF	T.vs.M	Epithelial cell
1.02162	3.86283e-55	RPS16	T.vs.N	Epithelial cell
-1.12774	9.18625e-55	TSTA3	N.vs.M	Epithelial cell
1.16788	9.49056e-55	RPL37	T.vs.M	Epithelial cell
1.58901	1.04478e-54	TIMP1	T.vs.N	Epithelial cell
-1.41848	1.32013e-54	PEBP4	T.vs.N	Epithelial cell
2.69037	1.6891e-54	ADIRF	N.vs.M	Epithelial cell
-2.00558	1.93544e-54	ODC1	T.vs.M	Epithelial cell
-1.44399	2.58027e-54	NCKAP5	T.vs.N	Epithelial cell
1.21122	6.48663e-54	EEF1A1	T.vs.M	Epithelial cell
1.52107	7.29486e-54	OCIAD2	T.vs.N	Epithelial cell
-1.17761	7.9279e-54	CPM	T.vs.M	Epithelial cell
1.32164	1.20328e-53	UQCRQ	T.vs.N	Epithelial cell
-1.36758	4.62028e-53	RARRES2	T.vs.M	Epithelial cell
1.66038	1.24778e-52	IGKC	T.vs.M	Epithelial cell
1.0662	3.85678e-52	MT.ND1	T.vs.N	Epithelial cell
1.35083	5.65902e-52	RPL15	T.vs.M	Epithelial cell
-1.12874	6.2125e-52	HSPD1	T.vs.M	Epithelial cell
-1.35131	8.19368e-52	FASN	N.vs.M	Epithelial cell
-1.11088	1.64986e-51	PBXIP1	T.vs.M	Epithelial cell
-1.48981	1.784e-51	HIST1H1C	N.vs.M	Epithelial cell
-1.23063	3.49061e-51	MALAT1	T.vs.M	Epithelial cell
2.91975	6.17603e-51	CLDN18	N.vs.M	Epithelial cell
-1.43856	2.01059e-50	SPTSSA	N.vs.M	Epithelial cell
1.21334	2.6154e-50	S100A11	T.vs.N	Epithelial cell
7.18817	2.77019e-50	SCGB1A1	N.vs.M	Epithelial cell
-1.2281	3.65418e-50	PEBP1	T.vs.M	Epithelial cell
-1.80335	7.61325e-50	NTM	T.vs.N	Epithelial cell
-1.43503	1.00835e-49	ISG15	N.vs.M	Epithelial cell
2.64946	2.39966e-49	S100A10	N.vs.M	Epithelial cell
-1.30543	2.62382e-49	OS9	N.vs.M	Epithelial cell
1.05034	2.8668e-49	ABCC3	T.vs.N	Epithelial cell
-1.19562	3.17507e-49	PTMA	N.vs.M	Epithelial cell
3.4629	1.53029e-48	SFTPD	N.vs.M	Epithelial cell
2.11378	2.94808e-48	GPX2	T.vs.N	Epithelial cell
-1.1898	7.21779e-48	NENF	N.vs.M	Epithelial cell
-1.15548	7.84042e-48	HSPE1	N.vs.M	Epithelial cell
2.03595	8.81227e-48	ANXA1	T.vs.M	Epithelial cell
-1.9983	3.49252e-47	CYP4B1	T.vs.N	Epithelial cell
3.32132	5.50153e-47	LCN2	T.vs.N	Epithelial cell
-1.54303	1.15225e-46	FTL	N.vs.M	Epithelial cell
-1.38457	1.27329e-46	ERP29	N.vs.M	Epithelial cell
-1.98292	1.67036e-46	ODC1	N.vs.M	Epithelial cell
-1.09928	1.92647e-46	PLAUR	N.vs.M	Epithelial cell
1.62351	2.99632e-46	TMSB10	T.vs.M	Epithelial cell
-2.68837	4.15334e-46	SCGB1A1	T.vs.N	Epithelial cell
1.45676	4.38724e-46	TXN	T.vs.N	Epithelial cell
1.98148	4.51955e-46	HLA.DRB1	N.vs.M	Epithelial cell
-2.07421	7.5808e-46	IGFBP7	T.vs.N	Epithelial cell
1.63506	1.19595e-45	S100A6	T.vs.M	Epithelial cell
-1.01301	1.62517e-45	ATP2A2	N.vs.M	Epithelial cell
-1.00268	1.66118e-45	RAMP1	T.vs.M	Epithelial cell
4.3753	1.68954e-45	CAV1	N.vs.M	Epithelial cell
-1.10111	2.45935e-45	GUK1	N.vs.M	Epithelial cell
-1.31371	2.49874e-45	AQP4	T.vs.N	Epithelial cell
-1.27821	2.80552e-45	MIF	N.vs.M	Epithelial cell
1.0177	8.15002e-45	PPP1R14B	T.vs.N	Epithelial cell
-2.46051	1.14791e-44	RGCC	T.vs.N	Epithelial cell
-1.03731	1.45225e-44	EEF1A2	T.vs.M	Epithelial cell
-1.15959	1.88036e-44	SDF2L1	N.vs.M	Epithelial cell
-1.14835	5.23283e-44	NEAT1	T.vs.M	Epithelial cell
1.14274	8.53443e-44	RPS3A	T.vs.M	Epithelial cell
-1.13289	1.14539e-43	EEF1D	N.vs.M	Epithelial cell
1.07311	2.70305e-43	RPL36	T.vs.M	Epithelial cell
2.33782	3.5639e-43	DPCR1	T.vs.N	Epithelial cell
1.7693	5.31599e-43	AGR3	T.vs.M	Epithelial cell
1.56896	7.75989e-43	MUC5B	T.vs.N	Epithelial cell
3.06724	9.53608e-43	TFF3	T.vs.N	Epithelial cell
1.0914	9.98436e-43	UQCRH	T.vs.N	Epithelial cell
1.60659	1.04648e-42	S100A11	T.vs.M	Epithelial cell
2.21814	1.85598e-42	AGR2	T.vs.N	Epithelial cell
-1.36274	3.13586e-42	KLK11	T.vs.M	Epithelial cell
-1.03014	3.214e-42	CLIC6	N.vs.M	Epithelial cell
1.96064	3.6665e-42	IL32	T.vs.M	Epithelial cell
1.687	5.31704e-42	LGALS3	T.vs.M	Epithelial cell
1.02317	5.928e-42	RPS23	T.vs.M	Epithelial cell
1.86375	7.93037e-42	HLA.DRB1	T.vs.M	Epithelial cell
1.50977	1.171e-41	MUC13	T.vs.N	Epithelial cell
1.43717	1.22233e-41	HLA.A	T.vs.M	Epithelial cell
-1.22502	1.40053e-41	HOPX	T.vs.M	Epithelial cell
-1.26621	4.20927e-41	TXNDC17	N.vs.M	Epithelial cell
1.93717	5.17965e-41	CEACAM5	T.vs.N	Epithelial cell
-1.13284	5.92886e-41	KIAA1324	N.vs.M	Epithelial cell
1.05195	6.92908e-41	RPL22	T.vs.M	Epithelial cell
-1.01717	1.99608e-40	H1F0	N.vs.M	Epithelial cell
1.06048	2.29471e-40	RPL27	T.vs.M	Epithelial cell
1.07202	2.64288e-40	MT.ND4L	T.vs.N	Epithelial cell
-1.01614	4.42977e-40	PLD3	T.vs.M	Epithelial cell
-1.29832	4.88576e-40	PDLIM2	T.vs.N	Epithelial cell
3.11088	4.9373e-40	RGCC	N.vs.M	Epithelial cell
-1.20306	4.96726e-40	RPS4Y1	T.vs.N	Epithelial cell
-1.5045	1.15137e-39	SLC2A3	T.vs.N	Epithelial cell
-1.11977	1.19288e-39	ARHGEF26	T.vs.N	Epithelial cell
-1.08304	1.42215e-39	TMED3	N.vs.M	Epithelial cell
-1.44709	1.79919e-39	DAPK2	T.vs.N	Epithelial cell
-1.28795	2.21913e-39	AQP3	N.vs.M	Epithelial cell
1.27027	2.43548e-39	BACE2	T.vs.N	Epithelial cell
-1.56485	2.66585e-39	CLDN18	T.vs.N	Epithelial cell
2.37295	7.04033e-39	LMO7	N.vs.M	Epithelial cell
-1.41985	7.80893e-39	SLC39A8	T.vs.N	Epithelial cell
8.64685	1.04977e-38	SFTPC	N.vs.M	Epithelial cell
1.91666	1.29478e-38	PEBP4	N.vs.M	Epithelial cell
-1.02907	1.70161e-38	PKM	N.vs.M	Epithelial cell
1.49377	1.81251e-38	LGALS4	T.vs.N	Epithelial cell
2.59678	1.871e-38	TFF1	T.vs.N	Epithelial cell
-1.09106	2.33509e-38	GKN2	T.vs.N	Epithelial cell
-1.13185	2.41253e-38	TTLL7	T.vs.N	Epithelial cell
2.8263	2.83648e-38	TSPAN8	T.vs.M	Epithelial cell
1.12368	5.03453e-38	RPL18A	T.vs.M	Epithelial cell
-1.29044	9.58714e-38	SSR4	N.vs.M	Epithelial cell
1.59296	1.2175e-37	MTRNR2L12	T.vs.M	Epithelial cell
2.87357	1.25258e-37	LYZ	T.vs.M	Epithelial cell
1.68064	1.54758e-37	CTSS	T.vs.M	Epithelial cell
-1.5419	1.67539e-37	NABP1	N.vs.M	Epithelial cell
-1.04972	1.77439e-37	LGALS3BP	N.vs.M	Epithelial cell
1.33728	2.07619e-37	SEC61G	T.vs.N	Epithelial cell
-1.51442	2.30095e-37	GADD45B	T.vs.N	Epithelial cell
1.63789	2.8591e-37	LGALS3	N.vs.M	Epithelial cell
1.05271	3.77994e-37	RPS16	T.vs.M	Epithelial cell
-1.04642	5.2132e-37	KRT7	T.vs.M	Epithelial cell
1.02684	5.3555e-37	ATP5I	T.vs.N	Epithelial cell
-1.25999	1.00881e-36	PDIA3	N.vs.M	Epithelial cell
-1.03597	1.75288e-36	RPL41	N.vs.M	Epithelial cell
-1.50206	1.9053e-36	NABP1	T.vs.M	Epithelial cell
2.51534	1.9497e-36	IGFBP7	N.vs.M	Epithelial cell
-1.31781	2.37258e-36	HSPA6	T.vs.M	Epithelial cell
-1.10508	2.94946e-36	GAPDH	N.vs.M	Epithelial cell
1.13409	3.2587e-36	TXNDC17	T.vs.N	Epithelial cell
-1.05555	3.62588e-36	RASD1	N.vs.M	Epithelial cell
1.51201	3.85748e-36	SEPP1	N.vs.M	Epithelial cell
-1.02499	3.89387e-36	IMPA2	N.vs.M	Epithelial cell
1.43979	4.03287e-36	MT.ND5	T.vs.M	Epithelial cell
1.42406	9.0001e-36	COX6B1	T.vs.M	Epithelial cell
1.61882	1.59128e-35	NQO1	T.vs.N	Epithelial cell
2.62278	2.10313e-35	HLA.DRA	T.vs.M	Epithelial cell
-1.98461	3.79583e-35	MYL9	T.vs.N	Epithelial cell
1.70123	4.44868e-35	TXNIP	T.vs.M	Epithelial cell
-1.04184	4.64033e-35	P4HB	N.vs.M	Epithelial cell
2.46689	5.01874e-35	CD74	T.vs.M	Epithelial cell
2.29781	5.80365e-35	LYZ	T.vs.N	Epithelial cell
5.20066	9.31278e-35	AGER	N.vs.M	Epithelial cell
1.34216	9.87571e-35	RPS10	T.vs.M	Epithelial cell
-1.33437	1.11919e-34	ADRB2	T.vs.N	Epithelial cell
1.69659	1.16266e-34	TPT1	N.vs.M	Epithelial cell
1.28568	1.82093e-34	HLA.B	N.vs.M	Epithelial cell
2.42528	2.13306e-34	HLA.DRA	N.vs.M	Epithelial cell
-1.70096	6.1672e-34	ANKRD29	T.vs.N	Epithelial cell
5.6982	1.38661e-33	SCGB3A1	T.vs.M	Epithelial cell
-1.62084	2.43737e-33	CST6	T.vs.N	Epithelial cell
1.35446	2.63447e-33	CIRBP	N.vs.M	Epithelial cell
-1.26214	5.01112e-33	DENND3	T.vs.N	Epithelial cell
1.14647	1.52146e-32	SSR4	T.vs.N	Epithelial cell
-1.07442	1.56852e-32	HSPB1	T.vs.M	Epithelial cell
1.65666	2.02863e-32	AQP1	N.vs.M	Epithelial cell
2.55224	2.51878e-32	FABP5	N.vs.M	Epithelial cell
-1.45553	3.58795e-32	CLIC3	T.vs.N	Epithelial cell
2.12707	4.31252e-32	ANXA2	N.vs.M	Epithelial cell
-1.0644	4.91361e-32	HSPA1A	N.vs.M	Epithelial cell
1.53112	5.33715e-32	RNASET2	T.vs.N	Epithelial cell
1.37718	6.03663e-31	HSD17B6	N.vs.M	Epithelial cell
4.49039	8.15074e-31	SPINK4	T.vs.N	Epithelial cell
-1.06482	2.02231e-30	EPHX1	N.vs.M	Epithelial cell
-1.01452	3.77307e-30	NR4A1	T.vs.M	Epithelial cell
-1.67123	6.26268e-30	DUSP1	T.vs.N	Epithelial cell
-1.23057	6.9532e-30	RPL39	N.vs.M	Epithelial cell
1.58157	7.66374e-30	SPINK5	T.vs.N	Epithelial cell
-1.45086	9.99939e-30	SFTPD	T.vs.N	Epithelial cell
1.00226	1.14342e-29	SH3BGRL3	T.vs.N	Epithelial cell
1.39374	1.23401e-29	HLA.C	T.vs.M	Epithelial cell
2.50859	1.29476e-29	CYP4B1	N.vs.M	Epithelial cell
1.26054	1.36706e-29	COMMD6	T.vs.M	Epithelial cell
1.02917	1.6491e-29	HLA.B	T.vs.N	Epithelial cell
1.73724	1.7507e-29	HLA.DPB1	N.vs.M	Epithelial cell
-1.02031	2.46894e-29	CP	N.vs.M	Epithelial cell
5.45439	2.83628e-29	SCGB3A1	N.vs.M	Epithelial cell
-1.25147	6.18548e-29	VAMP5	T.vs.M	Epithelial cell
1.50417	6.36972e-29	ANXA2	T.vs.M	Epithelial cell
1.86399	6.9893e-29	KRT17	T.vs.N	Epithelial cell
-1.446	7.59241e-29	LMO7	T.vs.N	Epithelial cell
1.2212	1.05078e-28	PHLDA2	T.vs.N	Epithelial cell
-1.01969	1.06252e-28	FKBP2	N.vs.M	Epithelial cell
1.09636	2.04641e-28	TCN1	T.vs.N	Epithelial cell
1.24241	2.0728e-28	S100A6	N.vs.M	Epithelial cell
1.51713	2.96167e-28	TSC22D3	N.vs.M	Epithelial cell
1.7741	3.86886e-28	HLA.DPA1	N.vs.M	Epithelial cell
-1.18396	8.10295e-28	FTH1	N.vs.M	Epithelial cell
2.05339	9.65293e-28	ANKRD29	N.vs.M	Epithelial cell
2.13984	2.11822e-27	ANXA3	N.vs.M	Epithelial cell
1.36636	2.27624e-27	PDLIM1	N.vs.M	Epithelial cell
-1.77292	2.43585e-27	S100A9	N.vs.M	Epithelial cell
1.24309	5.72337e-27	IFI6	T.vs.N	Epithelial cell
1.27529	7.45441e-27	RPS20	N.vs.M	Epithelial cell
4.11699	1.19582e-26	SPINK1	T.vs.M	Epithelial cell
1.83631	1.54015e-26	PLLP	N.vs.M	Epithelial cell
-1.98075	2.39431e-26	TIMP3	T.vs.N	Epithelial cell
1.79928	2.58769e-26	HLA.DPB1	T.vs.M	Epithelial cell
-1.2585	2.83548e-26	ID3	T.vs.N	Epithelial cell
1.62184	2.83598e-26	LGALS4	T.vs.M	Epithelial cell
1.26152	2.8798e-26	CAT	N.vs.M	Epithelial cell
1.23693	7.88244e-26	SDR16C5	N.vs.M	Epithelial cell
3.57952	1.5764e-25	MUC5AC	T.vs.M	Epithelial cell
1.36995	1.6197e-25	FOLR1	N.vs.M	Epithelial cell
2.30664	4.53985e-25	AGR3	N.vs.M	Epithelial cell
1.21216	4.61684e-25	CEACAM6	T.vs.N	Epithelial cell
1.09146	7.93183e-25	UQCR11	T.vs.M	Epithelial cell
1.32314	1.08537e-24	CA9	T.vs.N	Epithelial cell
1.60692	1.12692e-24	TXNIP	N.vs.M	Epithelial cell
2.61042	1.54434e-24	NTM	N.vs.M	Epithelial cell
1.89194	2.82078e-24	DUSP1	N.vs.M	Epithelial cell
-1.73554	4.13673e-24	MT1E	T.vs.N	Epithelial cell
1.25982	4.85108e-24	CTSE	T.vs.N	Epithelial cell
1.06773	6.46851e-24	TM4SF4	T.vs.N	Epithelial cell
-1.00187	6.54484e-24	PPIB	N.vs.M	Epithelial cell
1.25296	6.96168e-24	MT.ND4L	T.vs.M	Epithelial cell
1.89272	7.45097e-24	CD24	T.vs.M	Epithelial cell
1.76892	1.91902e-23	HLA.DPA1	T.vs.M	Epithelial cell
1.50729	2.06039e-23	RPS4Y1	N.vs.M	Epithelial cell
2.26071	2.13711e-23	S100A4	N.vs.M	Epithelial cell
1.52079	2.19668e-23	TIMP1	T.vs.M	Epithelial cell
1.99504	2.78296e-23	PIGR	T.vs.M	Epithelial cell
2.31651	3.04115e-23	MT1E	N.vs.M	Epithelial cell
2.60301	3.48289e-23	RTKN2	N.vs.M	Epithelial cell
1.77516	6.8055e-23	SLC39A8	N.vs.M	Epithelial cell
-1.3778	7.20003e-23	SPOCK2	T.vs.N	Epithelial cell
-1.3014	9.27249e-23	ANKRD1	T.vs.N	Epithelial cell
1.52023	1.08975e-22	GADD45B	N.vs.M	Epithelial cell
1.01675	1.24564e-22	ATP1B1	T.vs.N	Epithelial cell
1.22638	1.48513e-22	SMIM22	T.vs.M	Epithelial cell
1.73015	1.89968e-22	SLC2A3	N.vs.M	Epithelial cell
1.04323	1.9443e-22	KLF4	T.vs.N	Epithelial cell
-1.14535	2.37661e-22	CKB	T.vs.N	Epithelial cell
1.367	2.62531e-22	SEC61G	T.vs.M	Epithelial cell
1.60623	2.89711e-22	CYSTM1	N.vs.M	Epithelial cell
2.11712	6.5939e-22	CAV2	N.vs.M	Epithelial cell
-1.61578	8.36155e-22	CAV2	T.vs.N	Epithelial cell
3.26088	9.13656e-22	TPPP3	N.vs.M	Epithelial cell
2.22359	1.08065e-21	RAB11FIP1	N.vs.M	Epithelial cell
1.30403	1.14825e-21	BIRC3	T.vs.M	Epithelial cell
-1.04765	1.88328e-21	TNNC1	T.vs.N	Epithelial cell
1.85498	1.9599e-21	PLA2G2A	T.vs.N	Epithelial cell
1.26197	1.9599e-21	TM4SF5	T.vs.N	Epithelial cell
1.45466	1.97644e-21	TSC22D3	T.vs.M	Epithelial cell
1.05549	2.71376e-21	SDCBP	T.vs.M	Epithelial cell
1.79877	3.53258e-21	SPOCK2	N.vs.M	Epithelial cell
1.41298	7.19567e-21	OCIAD2	T.vs.M	Epithelial cell
1.90394	8.80397e-21	KLF6	N.vs.M	Epithelial cell
-1.18548	1.66619e-20	ICAM1	T.vs.N	Epithelial cell
1.67678	1.96987e-20	ID3	N.vs.M	Epithelial cell
1.04594	3.70362e-20	ALDH1A1	T.vs.M	Epithelial cell
2.33782	4.02791e-20	DPCR1	T.vs.M	Epithelial cell
-1.12748	4.55764e-20	VAMP5	N.vs.M	Epithelial cell
1.25113	7.43074e-20	SDCBP	N.vs.M	Epithelial cell
1.29283	1.39231e-19	MTRNR2L8	T.vs.M	Epithelial cell
1.09152	1.47368e-19	SEPP1	T.vs.M	Epithelial cell
1.18404	1.74261e-19	DBI	T.vs.M	Epithelial cell
1.50977	2.47351e-19	MUC13	T.vs.M	Epithelial cell
1.56076	2.83115e-19	SCEL	N.vs.M	Epithelial cell
2.02643	3.09148e-19	CYSTM1	T.vs.M	Epithelial cell
1.32672	3.12712e-19	PERP	T.vs.M	Epithelial cell
2.01204	3.39324e-19	SFTPD	T.vs.M	Epithelial cell
1.25644	3.82162e-19	ALDH1A1	N.vs.M	Epithelial cell
1.39778	4.7388e-19	IL32	N.vs.M	Epithelial cell
-1.70459	7.08749e-19	C20ORF85	T.vs.N	Epithelial cell
1.93454	8.56805e-19	CST6	N.vs.M	Epithelial cell
1.18764	8.90064e-19	HIST1H4C	T.vs.M	Epithelial cell
1.35734	1.97769e-18	AQP4	N.vs.M	Epithelial cell
2.20648	2.83154e-18	MYL9	N.vs.M	Epithelial cell
1.12356	2.86659e-18	EEF1A1	N.vs.M	Epithelial cell
1.04097	3.08658e-18	CTSS	N.vs.M	Epithelial cell
1.18738	3.10631e-18	CD9	N.vs.M	Epithelial cell
1.04467	3.33307e-18	HLA.F	T.vs.M	Epithelial cell
-2.36779	7.7582e-18	TPPP3	T.vs.N	Epithelial cell
1.14087	8.12986e-18	ANXA4	N.vs.M	Epithelial cell
1.01176	8.15798e-18	IGFBP2	T.vs.N	Epithelial cell
2.59678	1.12686e-17	TFF1	T.vs.M	Epithelial cell
1.31435	1.18647e-17	MSMB	T.vs.N	Epithelial cell
-1.83837	1.2034e-17	C9ORF24	T.vs.N	Epithelial cell
1.42987	1.46289e-17	NCKAP5	N.vs.M	Epithelial cell
-1.31211	1.48849e-17	C11ORF88	T.vs.N	Epithelial cell
2.07078	1.58825e-17	CD74	N.vs.M	Epithelial cell
1.73211	1.70991e-17	WFDC2	T.vs.N	Epithelial cell
1.4914	2.77253e-17	PSCA	T.vs.N	Epithelial cell
1.12176	4.84988e-17	TFPI	T.vs.M	Epithelial cell
1.03567	4.94923e-17	ANXA3	T.vs.M	Epithelial cell
1.43329	5.65858e-17	C19ORF33	T.vs.M	Epithelial cell
-1.19971	7.72383e-17	MGLL	T.vs.N	Epithelial cell
-1.27775	8.13532e-17	FAM105A	T.vs.N	Epithelial cell
1.21503	9.82783e-17	AKAP12	T.vs.N	Epithelial cell
-1.6042	1.22224e-16	FABP5	T.vs.N	Epithelial cell
-1.22909	1.77523e-16	CAPSL	T.vs.N	Epithelial cell
1.13664	2.04013e-16	COL8A1	N.vs.M	Epithelial cell
1.11799	2.53613e-16	GAS6	N.vs.M	Epithelial cell
1.07802	2.58743e-16	LAMB3	T.vs.M	Epithelial cell
1.88074	3.27909e-16	UPK3B	N.vs.M	Epithelial cell
1.18736	3.3795e-16	EFEMP1	N.vs.M	Epithelial cell
1.15265	3.9543e-16	RHOBTB3	N.vs.M	Epithelial cell
1.00261	5.53256e-16	GJA1	N.vs.M	Epithelial cell
1.31776	6.51879e-16	ID2	N.vs.M	Epithelial cell
1.13992	8.20327e-16	PTRF	N.vs.M	Epithelial cell
1.23173	1.46399e-15	SUSD2	N.vs.M	Epithelial cell
1.3549	1.58583e-15	CLDN18	T.vs.M	Epithelial cell
-1.72238	2.11087e-15	C1ORF194	T.vs.N	Epithelial cell
1.47503	2.18131e-15	C4BPA	N.vs.M	Epithelial cell
-1.11406	2.48525e-15	TUBB4B	T.vs.N	Epithelial cell
1.19914	2.51826e-15	DST	N.vs.M	Epithelial cell
1.0899	3.9875e-15	MUC1	T.vs.M	Epithelial cell
1.14961	4.04563e-15	ARHGEF26	N.vs.M	Epithelial cell
1.12895	4.22646e-15	AHNAK	N.vs.M	Epithelial cell
1.47003	5.3289e-15	ADRB2	N.vs.M	Epithelial cell
-1.49398	6.06965e-15	S100A4	T.vs.N	Epithelial cell
-1.17429	6.13172e-15	DNAAF1	T.vs.N	Epithelial cell
1.24806	6.14482e-15	ZFP36L1	N.vs.M	Epithelial cell
-1.08798	6.78944e-15	C2ORF40	T.vs.N	Epithelial cell
1.43091	7.61106e-15	TUBA1A	N.vs.M	Epithelial cell
1.03101	8.37377e-15	RPS27L	T.vs.M	Epithelial cell
1.1152	1.05706e-14	HLA.DMA	T.vs.M	Epithelial cell
2.32981	1.15194e-14	KRT17	T.vs.M	Epithelial cell
-1.81914	1.256e-14	TMEM190	T.vs.N	Epithelial cell
1.21976	1.77226e-14	TNNC1	N.vs.M	Epithelial cell
1.00047	1.85658e-14	DYNLT1	T.vs.M	Epithelial cell
1.64407	1.92195e-14	ID1	N.vs.M	Epithelial cell
-1.09035	2.102e-14	TUBA1A	T.vs.N	Epithelial cell
1.0008	2.26167e-14	PLA2G1B	N.vs.M	Epithelial cell
1.18203	2.74698e-14	NUPR1	T.vs.M	Epithelial cell
1.38221	3.205e-14	REG4	T.vs.N	Epithelial cell
1.88403	3.205e-14	TFF2	T.vs.N	Epithelial cell
1.01002	3.22893e-14	SLC25A5	T.vs.M	Epithelial cell
-1.0053	3.32276e-14	ZMYND10	T.vs.N	Epithelial cell
5.04408	3.46743e-14	SFTPA1	N.vs.M	Epithelial cell
1.06681	1.04513e-13	RPS28	N.vs.M	Epithelial cell
1.07148	1.20643e-13	VIM	N.vs.M	Epithelial cell
1.81104	1.23877e-13	SPINK5	T.vs.M	Epithelial cell
1.18679	1.40609e-13	CADM1	N.vs.M	Epithelial cell
1.03085	1.49085e-13	PNISR	N.vs.M	Epithelial cell
1.21809	2.00408e-13	ALDH3A1	T.vs.N	Epithelial cell
1.37833	2.67786e-13	CA2	T.vs.M	Epithelial cell
1.07484	3.76042e-13	SRSF3	N.vs.M	Epithelial cell
1.15611	4.52133e-13	PERP	N.vs.M	Epithelial cell
-1.06698	5.85414e-13	KLF6	T.vs.N	Epithelial cell
1.05868	6.02046e-13	N4BP2L2	N.vs.M	Epithelial cell
-1.04193	7.69373e-13	SCEL	T.vs.N	Epithelial cell
-1.51117	9.01363e-13	GPRC5A	T.vs.N	Epithelial cell
1.14322	9.01738e-13	TTLL7	N.vs.M	Epithelial cell
1.11614	1.12317e-12	CEBPD	N.vs.M	Epithelial cell
1.24817	1.47872e-12	PDLIM2	N.vs.M	Epithelial cell
1.09636	1.55872e-12	TCN1	T.vs.M	Epithelial cell
2.14063	1.57073e-12	KRT19	N.vs.M	Epithelial cell
1.03981	1.99869e-12	MUC6	T.vs.N	Epithelial cell
4.4708	2.66784e-12	SPINK4	T.vs.M	Epithelial cell
1.08424	4.94715e-12	APOC1	N.vs.M	Epithelial cell
1.0077	5.13266e-12	MAD1L1	T.vs.M	Epithelial cell
1.37844	5.52384e-12	DAPK2	N.vs.M	Epithelial cell
-1.13368	5.69301e-12	C5ORF49	T.vs.N	Epithelial cell
1.22625	5.92287e-12	AKR1C2	T.vs.N	Epithelial cell
1.32587	7.10262e-12	TSPO	T.vs.M	Epithelial cell
1.3611	9.47225e-12	KRT19	T.vs.M	Epithelial cell
1.3077	9.59042e-12	IFT57	N.vs.M	Epithelial cell
1.23387	1.08292e-11	PLAC8	N.vs.M	Epithelial cell
4.49979	1.23916e-11	SCGB1A1	T.vs.M	Epithelial cell
-2.38697	1.65579e-11	SFTPA1	T.vs.N	Epithelial cell
-1.36966	2.07717e-11	RAB11FIP1	T.vs.N	Epithelial cell
-1.09879	2.25841e-11	MS4A8	T.vs.N	Epithelial cell
-1.04224	2.26311e-11	EFNA1	T.vs.N	Epithelial cell
1.06463	2.56718e-11	AREG	T.vs.M	Epithelial cell
1.14692	3.19477e-11	FSTL3	N.vs.M	Epithelial cell
1.20524	4.46172e-11	GKN2	N.vs.M	Epithelial cell
1.0406	5.3794e-11	RP1	N.vs.M	Epithelial cell
3.51148	1.00063e-10	EMP2	N.vs.M	Epithelial cell
1.00937	1.48666e-10	RPL36A	T.vs.M	Epithelial cell
1.07131	1.49962e-10	TM4SF4	T.vs.M	Epithelial cell
1.10087	1.86763e-10	COL4A3	N.vs.M	Epithelial cell
1.24048	2.92211e-10	LGALS1	T.vs.M	Epithelial cell
1.02521	3.42835e-10	ARGLU1	N.vs.M	Epithelial cell
-1.35943	3.73361e-10	RSPH1	T.vs.N	Epithelial cell
1.00846	4.11225e-10	BLVRB	N.vs.M	Epithelial cell
-1.23953	4.18815e-10	PLLP	T.vs.N	Epithelial cell
1.42542	7.28956e-10	BIRC3	N.vs.M	Epithelial cell
1.34862	1.0203e-09	LGALS1	N.vs.M	Epithelial cell
1.00497	1.50414e-09	AKAP13	N.vs.M	Epithelial cell
1.85515	2.1958e-09	PIGR	N.vs.M	Epithelial cell
1.85498	5.21794e-09	PLA2G2A	T.vs.M	Epithelial cell
1.26197	5.21794e-09	TM4SF5	T.vs.M	Epithelial cell
1.00423	8.20406e-09	WFS1	N.vs.M	Epithelial cell
1.44176	9.77631e-09	EFNA1	N.vs.M	Epithelial cell
1.20485	2.56956e-08	MGST3	T.vs.M	Epithelial cell
1.25788	3.2815e-08	ZFP36L1	T.vs.M	Epithelial cell
1.00695	4.15984e-08	MYL12A	T.vs.M	Epithelial cell
2.20207	5.54561e-08	C9ORF24	N.vs.M	Epithelial cell
1.11394	6.94018e-08	AQP1	T.vs.M	Epithelial cell
1.16124	7.503e-08	C15ORF48	T.vs.M	Epithelial cell
1.24443	8.51384e-08	MRPS31	N.vs.M	Epithelial cell
1.11743	1.09657e-07	PLAC8	T.vs.M	Epithelial cell
-1.44761	2.8455e-07	FAM183A	T.vs.N	Epithelial cell
1.04411	5.31692e-07	RARRES3	N.vs.M	Epithelial cell
-1.82923	6.16421e-07	SFTPA2	T.vs.N	Epithelial cell
1.33819	9.47252e-07	CD151	N.vs.M	Epithelial cell
4.36449	1.25786e-06	SFTPA2	N.vs.M	Epithelial cell
1.54013	1.40364e-06	DBI	N.vs.M	Epithelial cell
1.26521	1.45258e-06	CA9	T.vs.M	Epithelial cell
1.5512	1.54784e-06	TSPAN13	N.vs.M	Epithelial cell
-1.31635	1.62381e-06	LRRIQ1	T.vs.N	Epithelial cell
-1.02886	2.04362e-06	TNFRSF12A	T.vs.N	Epithelial cell
-1.92173	2.07271e-06	CAPS	T.vs.N	Epithelial cell
2.41047	2.08449e-06	LCN2	T.vs.M	Epithelial cell
1.31843	2.22716e-06	HBEGF	N.vs.M	Epithelial cell
1.10119	2.55557e-06	AKAP12	T.vs.M	Epithelial cell
1.3014	3.22499e-06	ANKRD1	N.vs.M	Epithelial cell
-1.10417	3.55638e-06	ANXA3	T.vs.N	Epithelial cell
1.08083	6.21649e-06	LRRK2	N.vs.M	Epithelial cell
1.01636	6.77192e-06	C4BPA	T.vs.M	Epithelial cell
1.10772	1.80339e-05	CTSE	T.vs.M	Epithelial cell
1.38221	2.08113e-05	REG4	T.vs.M	Epithelial cell
1.88403	2.08113e-05	TFF2	T.vs.M	Epithelial cell
1.27181	4.83486e-05	ALDH3A1	T.vs.M	Epithelial cell
1.06092	4.86526e-05	EDN1	N.vs.M	Epithelial cell
1.1937	8.05902e-05	EFHC1	N.vs.M	Epithelial cell
1.3991	9.14666e-05	RNASET2	T.vs.M	Epithelial cell
1.02786	9.8183e-05	SLC34A2	N.vs.M	Epithelial cell
1.88766	0.00012759	C20ORF85	N.vs.M	Epithelial cell
1.16811	0.000127759	C2ORF40	N.vs.M	Epithelial cell
-1.0945	0.000130769	TSPAN13	T.vs.N	Epithelial cell
1.56135	0.000134647	TESC	T.vs.M	Epithelial cell
1.03981	0.000161589	MUC6	T.vs.M	Epithelial cell
2.09045	0.000188015	TMEM190	N.vs.M	Epithelial cell
1.19873	0.000189938	FABP6	N.vs.M	Epithelial cell
2.47714	0.000232477	PGC	T.vs.N	Epithelial cell
1.07758	0.000242423	SNTN	N.vs.M	Epithelial cell
1.18598	0.000425325	DENND3	N.vs.M	Epithelial cell
1.00992	0.000571062	FAM92B	N.vs.M	Epithelial cell
1.28101	0.000671124	CAPSL	N.vs.M	Epithelial cell
-1.4993	0	RPS29	T.vs.M	Helper T cell
-1.47751	0	RPS27	N.vs.M	Helper T cell
-2.03476	0	RPS29	N.vs.M	Helper T cell
-1.42137	0	RPL41	N.vs.M	Helper T cell
2.04003	1.40344e-291	SCGB1A1	N.vs.M	Helper T cell
1.68051	8.72198e-253	ZFP36L2	N.vs.M	Helper T cell
1.73182	1.91329e-249	TSC22D3	N.vs.M	Helper T cell
1.8222	1.05307e-242	APOC1	N.vs.M	Helper T cell
-1.13564	1.2779e-242	RPS27	T.vs.M	Helper T cell
1.97004	3.10001e-239	RPS4Y1	N.vs.M	Helper T cell
-1.47463	1.58156e-237	RPL37	N.vs.M	Helper T cell
1.72114	3.11779e-234	VIM	N.vs.M	Helper T cell
1.91339	2.42946e-227	FABP4	N.vs.M	Helper T cell
1.34815	3.21629e-223	HLA.DRA	N.vs.M	Helper T cell
1.63633	2.49192e-220	RGCC	N.vs.M	Helper T cell
1.66871	8.89309e-220	ANXA1	N.vs.M	Helper T cell
-1.60982	9.08842e-210	RPS26	T.vs.M	Helper T cell
1.55787	1.2157e-209	C1QA	N.vs.M	Helper T cell
1.26596	1.24338e-207	SARAF	N.vs.M	Helper T cell
2.02283	4.76885e-207	LMNA	N.vs.M	Helper T cell
1.14259	3.64956e-205	RSRP1	N.vs.M	Helper T cell
1.57196	5.38977e-205	APOE	N.vs.M	Helper T cell
-1.05696	1.28456e-204	RPL41	T.vs.M	Helper T cell
1.25574	1.1239e-199	TAGLN2	N.vs.M	Helper T cell
1.19699	8.06414e-198	FTL	N.vs.M	Helper T cell
-1.71268	5.13673e-197	RPS26	N.vs.M	Helper T cell
-1.3851	7.41868e-195	RPL37A	N.vs.M	Helper T cell
1.39819	3.92928e-193	KLF6	N.vs.M	Helper T cell
1.1764	4.38074e-191	TUBA1B	N.vs.M	Helper T cell
1.05406	7.32374e-190	EEF2	N.vs.M	Helper T cell
1.13516	6.50695e-189	MCL1	N.vs.M	Helper T cell
1.0712	8.26434e-185	PNRC1	N.vs.M	Helper T cell
1.25355	1.28182e-176	EZR	N.vs.M	Helper T cell
1.2392	1.5165e-176	PPP1R15A	N.vs.M	Helper T cell
-1.5765	7.9619e-176	RPS21	N.vs.M	Helper T cell
1.18679	5.87374e-175	LGALS3	N.vs.M	Helper T cell
-2.01265	1.16508e-174	AC090498.1	T.vs.M	Helper T cell
1.06524	5.40383e-174	ANXA2	N.vs.M	Helper T cell
1.01411	1.15036e-173	GLTSCR2	N.vs.M	Helper T cell
1.2472	8.62398e-169	RORA	N.vs.M	Helper T cell
1.69831	1.19047e-165	ANKRD28	N.vs.M	Helper T cell
1.29025	5.49206e-164	C1QB	N.vs.M	Helper T cell
1.2901	7.32539e-161	ATP2B1	N.vs.M	Helper T cell
-1.80707	1.82819e-160	FABP4	T.vs.N	Helper T cell
1.08475	1.29366e-153	MYADM	N.vs.M	Helper T cell
1.15666	1.38669e-152	FTH1	N.vs.M	Helper T cell
-2.5582	3.88032e-152	AC090498.1	N.vs.M	Helper T cell
-1.45836	2.0547e-151	RPS4Y1	T.vs.N	Helper T cell
-1.01877	3.70082e-151	RPS28	N.vs.M	Helper T cell
-1.53189	3.85278e-149	VIM	T.vs.N	Helper T cell
1.37518	3.87965e-148	PLIN2	N.vs.M	Helper T cell
1.02113	4.4386e-148	IDI1	N.vs.M	Helper T cell
-1.01503	9.27091e-144	RPL37	T.vs.M	Helper T cell
1.013	1.64793e-140	PBXIP1	N.vs.M	Helper T cell
1.06812	3.12679e-137	AHNAK	N.vs.M	Helper T cell
-1.01838	9.24631e-137	RPL31	T.vs.M	Helper T cell
-1.1884	1.63518e-135	RPL38	N.vs.M	Helper T cell
1.66456	2.72326e-135	SERPINH1	N.vs.M	Helper T cell
-1.01126	4.47666e-135	RPL31	N.vs.M	Helper T cell
1.00039	3.8166e-133	AIM1	N.vs.M	Helper T cell
-1.23773	4.87968e-133	APOC1	T.vs.N	Helper T cell
-1.15328	2.43733e-132	S100A4	T.vs.N	Helper T cell
-1.32526	2.20154e-131	C1QA	T.vs.N	Helper T cell
1.011	1.27373e-130	MT.CYB	N.vs.M	Helper T cell
-1.06982	3.93824e-130	S100A10	T.vs.N	Helper T cell
1.04083	5.61132e-129	SQSTM1	N.vs.M	Helper T cell
1.13521	2.18094e-127	FKBP4	N.vs.M	Helper T cell
1.25543	1.7968e-124	UBC	N.vs.M	Helper T cell
1.21428	4.08737e-124	LYZ	N.vs.M	Helper T cell
1.03398	7.15315e-119	CITED2	N.vs.M	Helper T cell
1.34122	4.6796e-109	MT.CYB	T.vs.M	Helper T cell
1.06292	1.33855e-107	HSPA8	N.vs.M	Helper T cell
1.21509	1.4397e-106	MT.ND2	T.vs.M	Helper T cell
-1.17104	1.05281e-97	UBC	T.vs.N	Helper T cell
-1.08006	3.46242e-97	ALOX5AP	T.vs.N	Helper T cell
-1.01892	8.34804e-97	C1QB	T.vs.N	Helper T cell
-1.76442	9.91769e-95	RPL36A	T.vs.M	Helper T cell
1.22636	4.29213e-94	MT.ND1	T.vs.M	Helper T cell
-1.09366	5.77073e-94	DYNLL1	T.vs.N	Helper T cell
-1.01305	1.42453e-90	RGCC	T.vs.N	Helper T cell
-1.51107	3.04073e-87	SERPINH1	T.vs.N	Helper T cell
2.6786	1.11064e-82	IGKC	T.vs.N	Helper T cell
-1.13459	3.25103e-82	PLIN2	T.vs.N	Helper T cell
-1.14652	1.74433e-80	DUSP5	T.vs.N	Helper T cell
1.93358	1.64602e-75	HSPA6	N.vs.M	Helper T cell
1.74345	7.26992e-73	SCGB3A1	T.vs.M	Helper T cell
-2.37167	5.32783e-70	RPL36A	N.vs.M	Helper T cell
1.23549	3.4487e-66	ZFP36L2	T.vs.M	Helper T cell
-1.13536	3.39186e-60	ATP5E	T.vs.M	Helper T cell
1.23032	5.19483e-55	STK4	T.vs.M	Helper T cell
1.00376	1.17866e-52	TSC22D3	T.vs.M	Helper T cell
-1.31348	1.8596e-49	NBEAL1	T.vs.M	Helper T cell
-1.43965	1.27359e-48	RPL17	T.vs.M	Helper T cell
1.74779	2.60489e-45	IGHA1	T.vs.N	Helper T cell
1.07326	2.42027e-44	MT.ND3	T.vs.N	Helper T cell
1.12792	9.80205e-43	SMCHD1	T.vs.M	Helper T cell
-1.28713	4.58099e-42	MT1X	T.vs.N	Helper T cell
-1.41502	4.10718e-41	ATP5E	N.vs.M	Helper T cell
-1.57177	2.24593e-40	ZNF90	T.vs.M	Helper T cell
1.16359	7.56109e-39	HSPA1A	N.vs.M	Helper T cell
1.0938	2.63273e-38	CD44	T.vs.M	Helper T cell
-1.31803	3.56714e-38	HSPA6	T.vs.N	Helper T cell
1.43512	3.34667e-34	SQSTM1	T.vs.M	Helper T cell
1.13239	3.32793e-31	PPP1R15A	T.vs.M	Helper T cell
1.27561	6.48923e-28	ANKRD28	T.vs.M	Helper T cell
1.0666	3.36314e-27	XIST	T.vs.M	Helper T cell
1.36247	1.11804e-24	JUN	T.vs.M	Helper T cell
-1.78023	1.35077e-24	IGKC	N.vs.M	Helper T cell
1.0946	2.7068e-24	LMNA	T.vs.M	Helper T cell
-1.29764	7.32067e-24	IFITM3	T.vs.M	Helper T cell
-1.66294	2.00694e-20	NBEAL1	N.vs.M	Helper T cell
1.04674	3.51516e-19	MIR24.2	T.vs.M	Helper T cell
1.25455	4.93701e-13	HSPA1A	T.vs.M	Helper T cell
-1.85253	2.29199e-12	ZNF90	N.vs.M	Helper T cell
1.43657	9.35938e-12	XIST	T.vs.N	Helper T cell
-1.55535	1.83401e-08	RPL17	N.vs.M	Helper T cell
-1.13954	8.91435e-08	CARD16	T.vs.M	Helper T cell
-1.03388	0.000389242	UBL5	N.vs.M	Helper T cell
-1.01101	0.000670861	COX7C	N.vs.M	Helper T cell
6.45638	1.43819e-55	SCGB1A1	N.vs.M	Pericyte
-4.89968	2.13742e-33	PGC	T.vs.M	Pericyte
2.01908	3.51706e-28	HLA.DRA	N.vs.M	Pericyte
-2.32436	3.724e-23	ATP5E	N.vs.M	Pericyte
-3.71174	2.52613e-20	WFDC2	N.vs.M	Pericyte
-2.28383	1.16993e-19	MDK	T.vs.M	Pericyte
3.84215	4.50665e-19	SCGB3A1	T.vs.M	Pericyte
-1.2195	6.18158e-18	ATP5E	T.vs.M	Pericyte
-1.59873	1.21899e-17	HOPX	T.vs.M	Pericyte
-4.3192	5.14329e-17	MDK	N.vs.M	Pericyte
2.18993	1.26915e-16	SLPI	N.vs.M	Pericyte
3.9828	3.50057e-15	SCGB3A1	N.vs.M	Pericyte
1.57601	4.16856e-15	MT.CO1	N.vs.M	Pericyte
-1.57561	5.12083e-15	CYB5A	T.vs.M	Pericyte
-3.42911	7.56165e-15	IFI27	N.vs.M	Pericyte
-1.632	1.90607e-14	PPDPF	T.vs.M	Pericyte
-1.59647	1.09733e-13	NPC2	T.vs.N	Pericyte
-1.13572	2.80425e-13	WFDC2	T.vs.M	Pericyte
1.96888	3.58674e-13	DBI	N.vs.M	Pericyte
-1.21016	1.38379e-12	RPS6	T.vs.N	Pericyte
1.86816	2.70757e-11	TYROBP	N.vs.M	Pericyte
1.60786	2.7726e-11	SAT1	N.vs.M	Pericyte
1.30211	2.83879e-11	MT.ND2	N.vs.M	Pericyte
1.12607	3.32794e-11	B2M	T.vs.M	Pericyte
-1.41089	8.13061e-11	SLPI	T.vs.N	Pericyte
1.50242	1.10471e-10	SFTA2	N.vs.M	Pericyte
-1.41616	1.3619e-10	AC090498.1	T.vs.M	Pericyte
1.55793	1.38374e-10	HLA.DPB1	N.vs.M	Pericyte
1.2283	2.03883e-10	NPC2	N.vs.M	Pericyte
-1.36498	2.07587e-10	CYB5A	T.vs.N	Pericyte
-1.21282	2.3665e-10	SFTPB	T.vs.N	Pericyte
-2.59299	1.00318e-09	KRT18	N.vs.M	Pericyte
-2.73333	1.01788e-09	SCGB1A1	T.vs.N	Pericyte
-4.29878	3.69924e-09	PGC	N.vs.M	Pericyte
1.31666	6.06629e-09	MT.ND1	N.vs.M	Pericyte
-1.99006	3.89756e-08	ALDOA	N.vs.M	Pericyte
-1.2966	5.17136e-08	LY6E	T.vs.M	Pericyte
-2.07998	7.31212e-08	HSP90AA1	N.vs.M	Pericyte
-2.83464	1.32845e-07	KRT7	N.vs.M	Pericyte
-2.32262	1.4091e-07	PSMA7	N.vs.M	Pericyte
1.54142	1.61301e-07	MT.ND1	T.vs.M	Pericyte
-1.95646	5.76296e-07	HSPE1	N.vs.M	Pericyte
-1.04711	6.09432e-07	HLA.DRA	T.vs.N	Pericyte
-1.29631	9.04285e-07	GNAS	T.vs.M	Pericyte
-1.83774	3.83755e-06	HSP90AB1	N.vs.M	Pericyte
-1.75309	4.46982e-06	PPDPF	N.vs.M	Pericyte
1.30996	5.23943e-06	MT.ND2	T.vs.M	Pericyte
-2.15572	7.02704e-06	GNAS	N.vs.M	Pericyte
-1.06129	1.02465e-05	RPL5	T.vs.N	Pericyte
-1.23612	1.13349e-05	DBI	T.vs.N	Pericyte
-1.24289	1.36971e-05	SFTA2	T.vs.N	Pericyte
1.54276	1.49199e-05	MT.ND3	T.vs.M	Pericyte
-1.90852	3.51405e-05	LY6E	N.vs.M	Pericyte
-1.67352	0.000114693	TXNDC17	N.vs.M	Pericyte
-1.03765	0.000129791	DDX21	T.vs.M	Pericyte
-1.26705	0.000140943	TPI1	N.vs.M	Pericyte
-1.16936	0.000144077	SAT1	T.vs.N	Pericyte
-1.87729	0.000191272	TYROBP	T.vs.N	Pericyte
-1.75226	0.000232813	KRT8	N.vs.M	Pericyte
-1.9035	0.000272226	HSPD1	N.vs.M	Pericyte
-1.95505	0.000437757	PKM	N.vs.M	Pericyte
-1.29313	0.0004906	PEBP1	T.vs.M	Pericyte
2.12972	0.000574337	ALDOA	T.vs.N	Pericyte
-2.09862	0.000590672	RPL22L1	N.vs.M	Pericyte
-1.62027	0.000602088	AC090498.1	N.vs.M	Pericyte
-1.41319	0.000678148	ACTG1	N.vs.M	Pericyte
2.25637	0.000681998	HSP90AA1	T.vs.N	Pericyte
-1.38878	0.000780679	PEBP1	T.vs.N	Pericyte
2.66491	0.000814132	IGKC	T.vs.N	Pericyte
-1.14029	0.000861391	CHCHD2	N.vs.M	Pericyte
-1.52581	0.000963642	IFITM3	N.vs.M	Pericyte
2.49594	6.12991e-46	IGKC	T.vs.N	MAST
2.37653	5.45494e-29	HSPA1B	T.vs.N	MAST
1.67041	4.36634e-27	IGHA1	T.vs.N	MAST
-1.72481	6.61028e-24	SDPR	T.vs.N	MAST
2.13268	3.67825e-20	ZFAND2A	T.vs.N	MAST
1.63389	1.65149e-18	DNAJA1	T.vs.N	MAST
1.20777	2.8713e-17	IGLC2	T.vs.N	MAST
-1.1358	4.58151e-16	IER2	T.vs.N	MAST
2.15108	3.91975e-15	HSPB1	T.vs.N	MAST
-1.41532	5.65261e-15	TUBA1A	T.vs.N	MAST
1.43774	2.00278e-12	HSPA8	T.vs.N	MAST
1.20099	1.15035e-10	TMEM176B	T.vs.N	MAST
1.4258	3.18581e-09	DNAJB4	T.vs.N	MAST
1.34776	9.3195e-08	CREM	T.vs.N	MAST
1.11011	1.18888e-07	HLA.B	T.vs.N	MAST
4.26046	5.23665e-07	MS4A2	N.vs.M	MAST
4.52647	1.07986e-06	LMNA	N.vs.M	MAST
2.66774	7.96299e-06	ANXA1	N.vs.M	MAST
2.99101	2.09943e-05	RGS13	N.vs.M	MAST
-1.53081	2.77419e-05	RPS27	T.vs.M	MAST
1.17885	2.79385e-05	APOE	T.vs.N	MAST
-1.78127	4.76454e-05	RPS29	T.vs.M	MAST
2.52655	5.08016e-05	TSC22D3	N.vs.M	MAST
3.68771	5.95651e-05	MS4A2	T.vs.M	MAST
2.08603	0.00016666	H3F3B	T.vs.M	MAST
1.95145	0.000251313	H3F3B	N.vs.M	MAST
-4.0723	0.000352404	IGHA1	N.vs.M	MAST
4.49528	0.000511416	LMNA	T.vs.M	MAST
1.84459	0.00052217	VIM	N.vs.M	MAST
2.71121	0.000558575	SLC18A2	N.vs.M	MAST
2.31279	0.000652304	TUBA1B	N.vs.M	MAST
3.81014	0.000988703	TUBA1A	N.vs.M	MAST
-1.64956	2.40296e-16	HLA.E	T.vs.N	Endothelial cell
1.63352	4.73659e-11	IGFBP7	T.vs.N	Endothelial cell
-2.10285	2.33788e-09	C10ORF10	T.vs.N	Endothelial cell
-1.26217	5.31604e-09	HLA.B	T.vs.N	Endothelial cell
-2.97142	6.66899e-09	VWA1	N.vs.M	Endothelial cell
2.0842	1.15023e-08	HSPG2	T.vs.N	Endothelial cell
2.21472	1.61206e-08	PLVAP	T.vs.N	Endothelial cell
1.93249	2.82707e-08	SPRY1	T.vs.N	Endothelial cell
1.20958	4.04021e-08	RPS19	T.vs.N	Endothelial cell
2.54396	4.72952e-08	ACKR1	T.vs.N	Endothelial cell
-2.36407	9.20235e-08	HSPG2	N.vs.M	Endothelial cell
-2.35429	1.1359e-07	PLVAP	N.vs.M	Endothelial cell
-2.01965	1.16463e-07	SPRY1	N.vs.M	Endothelial cell
-1.51425	1.65047e-07	SDPR	T.vs.N	Endothelial cell
-2.03943	1.91692e-07	UQCRQ	N.vs.M	Endothelial cell
4.61984	3.31098e-07	C10ORF10	N.vs.M	Endothelial cell
-2.18931	4.33555e-07	MT1E	T.vs.N	Endothelial cell
-2.62183	5.52693e-07	IL7R	T.vs.N	Endothelial cell
-1.42841	5.71281e-07	ITM2B	T.vs.N	Endothelial cell
1.84714	1.34805e-06	HLA.E	N.vs.M	Endothelial cell
-1.86502	1.44901e-06	IGFBP7	N.vs.M	Endothelial cell
1.47245	9.97413e-06	RPS2	T.vs.N	Endothelial cell
1.49643	1.52132e-05	VWA1	T.vs.N	Endothelial cell
-1.08536	2.18808e-05	IFI27	T.vs.N	Endothelial cell
1.07593	7.18956e-05	MGP	T.vs.N	Endothelial cell
-1.65199	8.62183e-05	EPAS1	T.vs.N	Endothelial cell
1.50102	8.8245e-05	MARCKSL1	T.vs.N	Endothelial cell
-1.88314	0.000124599	S100A4	T.vs.N	Endothelial cell
1.51713	0.000157531	FAM167B	T.vs.N	Endothelial cell
1.27066	0.000319467	UQCRQ	T.vs.N	Endothelial cell
1.52493	0.000567853	HLA.B	N.vs.M	Endothelial cell
-1.97413	0.000613628	COL4A1	N.vs.M	Endothelial cell
-1.71587	0.000629569	DUSP23	N.vs.M	Endothelial cell
3.4673	0.000690439	GPX3	N.vs.M	Endothelial cell
1.9474	3.1888e-158	HLA.DQA2	T.vs.M	Monocyte
2.61286	6.54487e-156	HLA.DRB5	T.vs.M	Monocyte
1.68175	1.22101e-153	HLA.DRA	T.vs.M	Monocyte
1.6101	9.91892e-141	SCGB3A1	T.vs.M	Monocyte
1.43751	3.47111e-137	HLA.DQA1	T.vs.M	Monocyte
1.55254	1.91451e-132	HLA.DPA1	T.vs.M	Monocyte
1.31543	5.95751e-121	CD74	T.vs.M	Monocyte
1.45412	7.66129e-114	HLA.DPB1	T.vs.M	Monocyte
1.1792	1.86743e-112	MT.CO1	T.vs.M	Monocyte
-1.32413	5.50395e-104	RPS29	T.vs.M	Monocyte
1.21404	8.6123e-96	HLA.DQB1	T.vs.M	Monocyte
1.44229	1.67718e-92	TMEM176B	T.vs.M	Monocyte
-1.07209	4.68762e-91	RPL37A	T.vs.M	Monocyte
1.14619	5.39948e-88	HLA.DMB	T.vs.M	Monocyte
-1.1221	2.09116e-84	RPS21	T.vs.M	Monocyte
1.24919	9.25223e-84	CD9	T.vs.M	Monocyte
1.42216	1.65248e-83	ACP5	T.vs.M	Monocyte
1.06328	5.4726e-82	HLA.DMA	T.vs.M	Monocyte
1.54465	4.94636e-75	HLA.DQA2	N.vs.M	Monocyte
1.74831	2.77439e-69	APOE	T.vs.M	Monocyte
1.00134	7.47819e-68	ZFAND5	T.vs.M	Monocyte
1.21004	3.05559e-66	LIPA	T.vs.M	Monocyte
1.00719	4.38393e-66	SCGB3A1	N.vs.M	Monocyte
-1.766	4.45623e-64	AC090498.1	T.vs.M	Monocyte
1.01523	6.67026e-64	TMEM176A	T.vs.M	Monocyte
-1.32579	7.05504e-64	ALOX5AP	T.vs.M	Monocyte
1.20526	3.26246e-63	CTSC	T.vs.M	Monocyte
2.00969	3.29443e-59	APOC1	T.vs.M	Monocyte
2.97946	3.81045e-58	IGKC	T.vs.N	Monocyte
1.59289	1.6308e-53	CCL18	T.vs.M	Monocyte
1.86627	2.78551e-53	IGHA1	T.vs.N	Monocyte
1.18662	1.02519e-50	NUPR1	T.vs.M	Monocyte
-1.65943	1.97527e-49	RPL36A	T.vs.M	Monocyte
1.89265	2.32121e-47	CCL13	T.vs.M	Monocyte
-5.69725	2.94828e-46	SPP1	N.vs.M	Monocyte
-1.46155	2.31437e-43	RPL37	N.vs.M	Monocyte
1.88644	4.4402e-43	CCL18	N.vs.M	Monocyte
1.22443	1.65741e-41	MT.CO1	N.vs.M	Monocyte
-1.61235	3.76293e-41	RPS29	N.vs.M	Monocyte
-1.1815	1.10986e-40	RPL41	N.vs.M	Monocyte
-1.09523	5.03861e-40	RPS26	T.vs.M	Monocyte
-1.40529	7.85309e-39	RPL37A	N.vs.M	Monocyte
-1.51923	7.28833e-37	RPS21	N.vs.M	Monocyte
1.8949	1.21751e-36	LMNA	N.vs.M	Monocyte
5.09498	6.45976e-36	SPP1	T.vs.N	Monocyte
1.20445	8.40306e-36	ALDH2	N.vs.M	Monocyte
1.34147	7.77502e-35	ACP5	N.vs.M	Monocyte
1.1836	9.3347e-34	KLF2	N.vs.M	Monocyte
1.41057	5.529e-33	HLA.DRB5	N.vs.M	Monocyte
1.19486	7.21087e-33	RNASE1	T.vs.M	Monocyte
1.30018	4.59554e-32	IGLC2	T.vs.N	Monocyte
-1.05135	4.73328e-31	RPL38	N.vs.M	Monocyte
-1.19398	4.7574e-31	ZNF90	T.vs.M	Monocyte
1.56322	3.8629e-29	CD9	N.vs.M	Monocyte
1.13488	4.69228e-28	TSC22D3	N.vs.M	Monocyte
1.01022	1.0058e-27	SERPINH1	N.vs.M	Monocyte
1.54332	1.06197e-27	RGCC	N.vs.M	Monocyte
1.31269	3.915e-27	EZR	N.vs.M	Monocyte
-1.66428	1.64914e-26	ALOX5AP	N.vs.M	Monocyte
-2.26043	6.48331e-26	MIF	N.vs.M	Monocyte
1.16973	1.6789e-25	EMP1	N.vs.M	Monocyte
-1.41376	1.65889e-24	CRIP1	T.vs.N	Monocyte
1.39052	2.42006e-24	HLA.DRA	N.vs.M	Monocyte
1.70207	7.05559e-24	HLA.DPB1	N.vs.M	Monocyte
-1.50376	1.28356e-23	VCAN	T.vs.M	Monocyte
-1.60598	2.91962e-23	ATP5I	N.vs.M	Monocyte
1.02213	3.30871e-23	UBC	N.vs.M	Monocyte
-2.06431	7.27882e-23	RPL36A	N.vs.M	Monocyte
1.5927	1.06312e-22	HLA.DPA1	N.vs.M	Monocyte
-1.09225	2.80887e-22	GAPDH	N.vs.M	Monocyte
1.34864	5.00098e-22	CRIP1	N.vs.M	Monocyte
-1.93143	1.45887e-21	AC090498.1	N.vs.M	Monocyte
1.17669	1.90332e-21	CD55	N.vs.M	Monocyte
-1.75394	1.24649e-20	LMNA	T.vs.N	Monocyte
1.7312	2.61019e-20	RGS1	T.vs.N	Monocyte
1.10543	5.75056e-20	CFD	N.vs.M	Monocyte
1.00928	9.8938e-20	KLF4	N.vs.M	Monocyte
1.05169	3.31285e-19	CTSS	N.vs.M	Monocyte
-1.19315	1.43921e-18	MIF	T.vs.M	Monocyte
-1.15883	2.41597e-17	SNHG25	T.vs.M	Monocyte
-1.17107	4.11015e-17	EMP1	T.vs.N	Monocyte
1.06728	4.12177e-16	MIF	T.vs.N	Monocyte
1.04015	2.49974e-15	IL7R	N.vs.M	Monocyte
1.21082	3.62285e-15	LGALS3	N.vs.M	Monocyte
1.04956	3.8283e-14	MAFB	N.vs.M	Monocyte
-2.31319	5.34502e-14	MT1G	T.vs.M	Monocyte
1.01108	7.64679e-14	ZFAND5	N.vs.M	Monocyte
-1.23022	1.37848e-13	RGCC	T.vs.N	Monocyte
-3.39641	1.99959e-13	IGKC	N.vs.M	Monocyte
-1.07356	3.09205e-13	UQCR11	N.vs.M	Monocyte
1.09389	3.89929e-12	HLA.DQB1	N.vs.M	Monocyte
1.01608	9.42012e-12	MARCKS	T.vs.N	Monocyte
-1.19054	8.12084e-11	NBEAL1	N.vs.M	Monocyte
1.66294	1.2585e-10	RNASE1	T.vs.N	Monocyte
-1.11958	1.99835e-10	ZNF90	N.vs.M	Monocyte
-1.10774	2.01252e-10	RPS26	N.vs.M	Monocyte
-1.04435	3.71221e-10	NDUFA1	N.vs.M	Monocyte
1.12286	4.43997e-10	CTSZ	N.vs.M	Monocyte
-1.0787	5.05852e-10	EZR	T.vs.N	Monocyte
1.01356	5.46374e-10	FTL	T.vs.N	Monocyte
1.00874	7.12754e-10	TREM2	T.vs.N	Monocyte
-1.34484	1.74906e-09	SNHG25	N.vs.M	Monocyte
1.13287	5.36201e-09	LIPA	T.vs.N	Monocyte
-1.21959	5.54672e-09	NDUFB1	N.vs.M	Monocyte
2.3545	3.84503e-08	CCL13	N.vs.M	Monocyte
-1.58753	6.20213e-08	S100A9	T.vs.M	Monocyte
-1.24303	9.16451e-08	CD14	N.vs.M	Monocyte
-1.09646	9.29229e-08	CD55	T.vs.N	Monocyte
-1.05456	1.78616e-07	RPL17	N.vs.M	Monocyte
-1.29543	1.04757e-06	CXCL8	T.vs.M	Monocyte
-2.48368	1.19274e-06	S100A8	T.vs.M	Monocyte
1.20229	2.17226e-06	HLA.DRB5	T.vs.N	Monocyte
-2.46346	7.86903e-06	CXCL8	N.vs.M	Monocyte
-1.07012	4.36155e-05	UQCRHL	N.vs.M	Monocyte
-2.83499	0.000245452	IGHA1	N.vs.M	Monocyte
-1.51458	0.000499041	HIST1H4C	T.vs.M	Monocyte
-3.796	3.40296e-113	FABP4	T.vs.N	Fibroblast
5.63631	7.1826e-82	FABP4	N.vs.M	Fibroblast
-2.14276	1.10151e-59	RPS29	N.vs.M	Fibroblast
-1.72779	2.16733e-56	RPL41	N.vs.M	Fibroblast
1.35278	1.63081e-54	FTH1	N.vs.M	Fibroblast
3.40728	2.64836e-46	IGKC	T.vs.N	Fibroblast
-1.94651	2.62148e-45	RPL37	N.vs.M	Fibroblast
-1.55762	6.06703e-44	S100A4	T.vs.N	Fibroblast
2.99996	1.61433e-41	RGS1	T.vs.N	Fibroblast
-1.57012	3.0377e-39	RPS29	T.vs.M	Fibroblast
-1.74321	3.09534e-37	CD52	T.vs.N	Fibroblast
-1.44909	4.52613e-37	MT.CO1	T.vs.N	Fibroblast
-1.24171	7.62007e-36	S100A6	T.vs.N	Fibroblast
-1.48722	1.4137e-35	RPS27	N.vs.M	Fibroblast
-1.19969	1.51353e-34	RPL41	T.vs.M	Fibroblast
1.9732	1.54312e-33	MT.CO1	N.vs.M	Fibroblast
-1.71179	2.38836e-33	RPL36	N.vs.M	Fibroblast
1.67869	4.8959e-33	S100A4	N.vs.M	Fibroblast
-1.84822	2.27015e-29	GAPDH	N.vs.M	Fibroblast
-1.43002	4.11584e-29	RPL37	T.vs.M	Fibroblast
1.87354	9.65149e-29	LGALS3	N.vs.M	Fibroblast
-1.2589	1.25823e-27	RPL23A	N.vs.M	Fibroblast
-2.25171	1.40908e-27	CRIP1	T.vs.N	Fibroblast
-1.79569	1.95512e-27	RPS21	N.vs.M	Fibroblast
-1.39298	8.75766e-26	RPL31	N.vs.M	Fibroblast
-1.34791	4.79731e-25	LGALS3	T.vs.N	Fibroblast
-1.33136	5.39196e-25	RPS28	N.vs.M	Fibroblast
-1.7692	1.3718e-24	RPS26	N.vs.M	Fibroblast
-2.45757	3.62172e-24	MIF	N.vs.M	Fibroblast
1.13269	7.97793e-23	S100A6	N.vs.M	Fibroblast
-1.2853	2.65818e-22	MT.CYB	T.vs.N	Fibroblast
-1.02082	4.20574e-22	MT.CO2	T.vs.N	Fibroblast
1.08458	1.13667e-21	HLA.DRA	T.vs.M	Fibroblast
-4.34014	4.94818e-21	IGKC	N.vs.M	Fibroblast
1.1049	6.32252e-21	CD74	T.vs.M	Fibroblast
1.47418	8.53889e-21	HLA.DPA1	T.vs.M	Fibroblast
1.92224	1.01684e-20	MT.CYB	N.vs.M	Fibroblast
2.19972	2.1229e-19	IGHA1	T.vs.N	Fibroblast
1.3199	1.08316e-17	GAPDH	T.vs.N	Fibroblast
1.24242	5.8745e-17	CD52	N.vs.M	Fibroblast
-1.33454	6.64761e-17	RPS21	T.vs.M	Fibroblast
1.36013	1.26876e-16	NPC2	T.vs.N	Fibroblast
1.06596	2.0001e-16	ACTB	T.vs.M	Fibroblast
2.13001	3.36185e-16	CRIP1	N.vs.M	Fibroblast
-1.16158	3.63916e-16	RPS8	N.vs.M	Fibroblast
-1.24162	3.99779e-16	RPL35A	N.vs.M	Fibroblast
-1.05816	4.40012e-16	RPL39	N.vs.M	Fibroblast
-1.07081	6.90073e-15	RPL31	T.vs.M	Fibroblast
-1.03668	5.05433e-14	RPL36	T.vs.M	Fibroblast
1.10859	7.42896e-14	MT.CO2	N.vs.M	Fibroblast
1.87587	6.83613e-13	RGS1	T.vs.M	Fibroblast
-1.32286	9.16479e-13	LGALS1	N.vs.M	Fibroblast
-3.43054	1.51297e-12	IGHA1	N.vs.M	Fibroblast
1.2988	2.03153e-12	HLA.B	T.vs.M	Fibroblast
-1.64757	2.26456e-12	USMG5	N.vs.M	Fibroblast
-1.43841	2.45301e-12	NPC2	N.vs.M	Fibroblast
-1.21095	2.72102e-12	RPS26	T.vs.M	Fibroblast
1.17319	3.74338e-12	HLA.DPB1	T.vs.M	Fibroblast
1.43489	4.24514e-12	C1QC	T.vs.N	Fibroblast
1.00428	5.40154e-12	AIF1	T.vs.N	Fibroblast
-1.0357	1.70771e-11	RPS17	N.vs.M	Fibroblast
-1.01546	2.31225e-11	RPS25	N.vs.M	Fibroblast
-1.30176	7.76474e-11	TAGLN2	T.vs.N	Fibroblast
1.20325	2.60819e-10	FABP5	N.vs.M	Fibroblast
1.07946	3.7447e-10	HLA.C	N.vs.M	Fibroblast
2.19489	4.82393e-10	TSC22D3	N.vs.M	Fibroblast
1.00868	6.42903e-10	HLA.DPA1	T.vs.N	Fibroblast
1.48108	4.60239e-09	TAGLN2	N.vs.M	Fibroblast
1.09614	7.83712e-09	MT.ND1	N.vs.M	Fibroblast
1.61142	8.76081e-08	LMNA	N.vs.M	Fibroblast
1.0987	9.00462e-08	CD68	N.vs.M	Fibroblast
1.71793	2.34343e-07	RGS2	T.vs.N	Fibroblast
1.30078	3.1058e-07	HLA.A	T.vs.M	Fibroblast
1.39867	3.34839e-07	LYZ	N.vs.M	Fibroblast
1.33693	6.05966e-07	MGST3	N.vs.M	Fibroblast
-1.13555	1.09506e-06	LY6E	T.vs.N	Fibroblast
1.31094	3.42873e-06	LY6E	N.vs.M	Fibroblast
1.12782	4.38707e-06	CAPG	T.vs.M	Fibroblast
1.20168	4.92426e-06	CALM2	N.vs.M	Fibroblast
1.15751	6.09929e-06	HLA.DQA1	T.vs.M	Fibroblast
1.19034	6.95495e-06	SOD2	T.vs.N	Fibroblast
1.2151	1.11651e-05	MIF	T.vs.N	Fibroblast
2.06382	2.06339e-05	SCGB3A1	T.vs.M	Fibroblast
1.03631	2.52648e-05	MT.ATP6	N.vs.M	Fibroblast
-1.42842	2.72843e-05	ATP5I	N.vs.M	Fibroblast
1.19648	3.5123e-05	DUSP1	N.vs.M	Fibroblast
1.04013	4.90444e-05	RGS10	T.vs.N	Fibroblast
1.04763	4.93244e-05	ARPC1B	N.vs.M	Fibroblast
1.04177	7.37491e-05	HLA.C	T.vs.M	Fibroblast
1.03936	9.6266e-05	ITM2B	T.vs.M	Fibroblast
-1.0807	0.000149598	USMG5	T.vs.M	Fibroblast
-1.24247	0.00019127	MIF	T.vs.M	Fibroblast
1.23058	0.000285643	SOD2	T.vs.M	Fibroblast
1.13913	0.000370631	EVL	N.vs.M	Fibroblast
-1.2097	0.000825467	GYPC	T.vs.N	Fibroblast
3.31166	1.08767e-13	LUM	T.vs.M	Mesenchymal progenitors
5.57535	3.01124e-12	LUM	T.vs.N	Mesenchymal progenitors
5.41726	9.37582e-12	COL3A1	T.vs.N	Mesenchymal progenitors
4.72929	1.21982e-09	COL1A1	T.vs.N	Mesenchymal progenitors
2.25991	3.28757e-09	AEBP1	T.vs.M	Mesenchymal progenitors
3.01869	3.68182e-09	IGKC	T.vs.N	Mesenchymal progenitors
2.09083	2.24596e-08	RARRES2	T.vs.M	Mesenchymal progenitors
-2.63365	6.36754e-08	GPX3	T.vs.N	Mesenchymal progenitors
3.18763	8.05664e-08	POSTN	T.vs.M	Mesenchymal progenitors
3.11452	2.39023e-07	TIMP1	T.vs.N	Mesenchymal progenitors
2.00513	6.24412e-07	THBS2	T.vs.M	Mesenchymal progenitors
3.30697	1.0737e-06	COL1A2	T.vs.N	Mesenchymal progenitors
2.35299	1.13219e-06	COL6A3	T.vs.M	Mesenchymal progenitors
2.03627	1.20984e-06	SCGB3A1	T.vs.M	Mesenchymal progenitors
1.82783	3.68982e-06	THY1	T.vs.M	Mesenchymal progenitors
4.49698	4.47793e-06	MMP11	T.vs.M	Mesenchymal progenitors
1.38693	4.87144e-06	MT.ATP6	T.vs.M	Mesenchymal progenitors
3.78118	7.36586e-06	CTHRC1	T.vs.N	Mesenchymal progenitors
2.10781	8.27836e-06	ISLR	T.vs.M	Mesenchymal progenitors
-1.83954	1.32464e-05	IFITM3	N.vs.M	Mesenchymal progenitors
1.6212	1.54077e-05	MFAP2	T.vs.M	Mesenchymal progenitors
1.98592	1.62431e-05	COL1A2	T.vs.M	Mesenchymal progenitors
-1.50197	1.77466e-05	RPS27	N.vs.M	Mesenchymal progenitors
1.8457	1.94773e-05	MMP2	T.vs.M	Mesenchymal progenitors
1.33063	2.32563e-05	ANTXR1	T.vs.M	Mesenchymal progenitors
-2.0697	3.00504e-05	RPL37	N.vs.M	Mesenchymal progenitors
2.80299	4.59319e-05	THY1	T.vs.N	Mesenchymal progenitors
-1.94707	6.0306e-05	PPP1R14A	T.vs.N	Mesenchymal progenitors
-1.33058	0.000112705	RPL41	N.vs.M	Mesenchymal progenitors
1.87021	0.000124923	IGHA1	T.vs.N	Mesenchymal progenitors
1.39203	0.000173454	MFAP4	T.vs.M	Mesenchymal progenitors
1.3967	0.000196911	IFITM3	T.vs.N	Mesenchymal progenitors
2.27079	0.000203569	COL5A2	T.vs.N	Mesenchymal progenitors
1.51471	0.000203687	CDH11	T.vs.M	Mesenchymal progenitors
2.59999	0.000237356	MMP2	T.vs.N	Mesenchymal progenitors
1.33823	0.000257227	RBP1	T.vs.M	Mesenchymal progenitors
2.8982	0.000258964	SFRP2	T.vs.M	Mesenchymal progenitors
3.18763	0.000259102	POSTN	T.vs.N	Mesenchymal progenitors
1.7533	0.000270564	COL3A1	T.vs.M	Mesenchymal progenitors
-1.62666	0.000294812	AC090498.1	T.vs.M	Mesenchymal progenitors
1.60403	0.000296248	HLA.DRA	N.vs.M	Mesenchymal progenitors
1.5074	0.000298719	IGHG4	T.vs.M	Mesenchymal progenitors
2.12658	0.000550823	VCAN	T.vs.M	Mesenchymal progenitors
1.2765	0.000641975	COL8A1	T.vs.M	Mesenchymal progenitors
2.68021	0.000649943	TACC1	N.vs.M	Mesenchymal progenitors
-1.96894	0.000652439	TACC1	T.vs.N	Mesenchymal progenitors
1.81653	0.000779583	MT.ATP6	N.vs.M	Mesenchymal progenitors
2.10425	0.000918088	COL10A1	T.vs.M	Mesenchymal progenitors
1.71533	0.000943623	PRRX1	T.vs.N	Mesenchymal progenitors
1.69729	3.77302e-69	IGHA1	T.vs.N	Dentritic cell
2.30647	1.09242e-63	IGKC	T.vs.N	Dentritic cell
1.17489	1.51124e-42	IGLC2	T.vs.N	Dentritic cell
-1.10395	1.8419e-35	RPS27	T.vs.M	Dentritic cell
-1.49473	1.82553e-33	RPS29	T.vs.M	Dentritic cell
1.71809	1.12145e-31	SCGB3A1	T.vs.M	Dentritic cell
1.16278	1.56452e-29	SCGB3A1	T.vs.N	Dentritic cell
-1.21619	3.30718e-27	RPS29	N.vs.M	Dentritic cell
1.47136	1.17377e-25	HLA.DQA2	T.vs.M	Dentritic cell
1.35132	1.31442e-25	IGHA1	T.vs.M	Dentritic cell
1.96437	2.61715e-25	LMNA	N.vs.M	Dentritic cell
1.21236	6.96766e-24	HLA.DQA2	N.vs.M	Dentritic cell
2.62163	4.594e-23	HLA.DRB5	T.vs.M	Dentritic cell
1.3005	1.55279e-22	HSP90AA1	T.vs.N	Dentritic cell
1.14389	1.62316e-22	HLA.C	N.vs.M	Dentritic cell
1.11647	1.87257e-22	SFTPC	N.vs.M	Dentritic cell
-2.40108	2.24909e-20	PLAC8	N.vs.M	Dentritic cell
-1.17904	3.9842e-20	RGCC	T.vs.N	Dentritic cell
1.30279	7.76458e-20	VIM	N.vs.M	Dentritic cell
1.26595	1.55019e-19	SCGB1A1	N.vs.M	Dentritic cell
1.39803	2.63469e-19	EMP3	N.vs.M	Dentritic cell
1.63741	1.15594e-17	CCL17	N.vs.M	Dentritic cell
1.36213	1.92761e-17	HSPB1	T.vs.N	Dentritic cell
-1.43767	1.69583e-16	FCGR2B	T.vs.N	Dentritic cell
1.40455	2.41614e-16	IGKC	T.vs.M	Dentritic cell
1.26494	2.58269e-16	LGALS3	N.vs.M	Dentritic cell
1.01378	1.03329e-14	HLA.A	N.vs.M	Dentritic cell
1.0762	1.37894e-14	CXCL16	N.vs.M	Dentritic cell
-1.18779	2.09978e-14	VSIG4	T.vs.N	Dentritic cell
1.62323	4.40312e-14	HLA.DRB5	N.vs.M	Dentritic cell
1.32427	5.65728e-14	LGALS2	N.vs.M	Dentritic cell
1.37492	5.12041e-12	RGCC	N.vs.M	Dentritic cell
1.25881	5.33796e-12	DNAJA4	T.vs.N	Dentritic cell
1.15261	5.3967e-12	BAG3	T.vs.N	Dentritic cell
1.04919	2.36841e-11	ANXA2	T.vs.M	Dentritic cell
1.67335	3.48179e-11	CD1B	N.vs.M	Dentritic cell
1.12524	3.8476e-11	KLF4	N.vs.M	Dentritic cell
1.01328	4.11307e-11	TAGLN2	N.vs.M	Dentritic cell
-1.24675	4.76478e-11	AIF1	N.vs.M	Dentritic cell
1.12775	5.99595e-11	ZFAND5	N.vs.M	Dentritic cell
-1.23145	6.22063e-11	RPS26	T.vs.M	Dentritic cell
1.071	1.14675e-10	MAFF	N.vs.M	Dentritic cell
1.30741	2.58744e-09	CD1B	T.vs.M	Dentritic cell
1.59053	4.10407e-09	CCL17	T.vs.M	Dentritic cell
1.14524	1.62471e-08	C15ORF48	T.vs.N	Dentritic cell
-1.39588	3.01236e-08	PLAC8	T.vs.M	Dentritic cell
-1.02721	3.84223e-08	HSP90AA1	N.vs.M	Dentritic cell
1.06687	6.59307e-08	CXCR4	N.vs.M	Dentritic cell
1.14937	1.11439e-07	CD1E	T.vs.M	Dentritic cell
1.00345	1.1875e-07	TGFBI	T.vs.M	Dentritic cell
1.02606	1.96198e-07	ZFP36L2	N.vs.M	Dentritic cell
1.11037	2.43453e-06	LMNA	T.vs.M	Dentritic cell
1.17025	4.18109e-06	IL7R	N.vs.M	Dentritic cell
-1.43932	6.52383e-06	CKLF	N.vs.M	Dentritic cell
1.15196	1.10788e-05	FCGR2B	N.vs.M	Dentritic cell
1.65506	1.7e-05	S100B	T.vs.N	Dentritic cell
1.3815	3.84785e-05	TACSTD2	T.vs.M	Dentritic cell
1.10278	3.99246e-05	CD1E	N.vs.M	Dentritic cell
2.89622	0	HSP90AA1	T.vs.N	Cytotoxic T cell
2.13353	0	DNAJA1	T.vs.N	Cytotoxic T cell
2.37669	0	HSP90AB1	T.vs.N	Cytotoxic T cell
2.43029	0	HSPB1	T.vs.N	Cytotoxic T cell
1.84468	0	HSPA8	T.vs.N	Cytotoxic T cell
2.41146	0	HSPE1	T.vs.N	Cytotoxic T cell
1.92036	0	CACYBP	T.vs.N	Cytotoxic T cell
2.9736	0	HSPH1	T.vs.N	Cytotoxic T cell
2.8745	0	DNAJB1	T.vs.N	Cytotoxic T cell
2.55327	0	HSPD1	T.vs.N	Cytotoxic T cell
1.52077	0	UBB	T.vs.N	Cytotoxic T cell
2.13488	0	JUN	T.vs.N	Cytotoxic T cell
2.93129	0	HSPA1B	T.vs.N	Cytotoxic T cell
3.62245	0	HSPA1A	T.vs.N	Cytotoxic T cell
2.13254	0	IGKC	T.vs.N	Cytotoxic T cell
-2.06349	0	FGFBP2	T.vs.N	Cytotoxic T cell
1.46399	0	MT.ATP6	T.vs.M	Cytotoxic T cell
1.77698	0	MT.ATP6	N.vs.M	Cytotoxic T cell
-2.07569	0	IGKC	N.vs.M	Cytotoxic T cell
1.65367	1.56801e-291	IGHA1	T.vs.N	Cytotoxic T cell
-2.83673	8.48206e-292	HSPA1A	N.vs.M	Cytotoxic T cell
1.8849	1.53951e-281	CTSW	N.vs.M	Cytotoxic T cell
-2.15534	1.20483e-274	HSP90AA1	N.vs.M	Cytotoxic T cell
-2.8891	9.84009e-263	CXCL13	N.vs.M	Cytotoxic T cell
2.17478	9.3989e-260	DUSP4	T.vs.N	Cytotoxic T cell
1.33336	1.05929e-259	UBC	T.vs.N	Cytotoxic T cell
1.99567	3.98677e-256	ZFAND2A	T.vs.N	Cytotoxic T cell
-1.48355	2.52708e-245	IGLC2	N.vs.M	Cytotoxic T cell
2.02563	5.81848e-244	SERPINH1	T.vs.N	Cytotoxic T cell
2.13927	1.614e-243	RGS1	T.vs.N	Cytotoxic T cell
-1.15031	8.01312e-240	S100A4	T.vs.N	Cytotoxic T cell
2.68177	4.90599e-239	HSPA6	T.vs.N	Cytotoxic T cell
1.3516	4.44769e-236	IGHA1	T.vs.M	Cytotoxic T cell
1.41067	4.54757e-236	RPS26	N.vs.M	Cytotoxic T cell
-2.21729	2.28571e-231	HSPH1	N.vs.M	Cytotoxic T cell
1.73163	4.696e-224	NR4A1	T.vs.N	Cytotoxic T cell
-2.59019	9.54797e-220	HSPB1	N.vs.M	Cytotoxic T cell
-2.08114	2.62171e-218	HSPE1	N.vs.M	Cytotoxic T cell
1.62751	1.65497e-212	FKBP4	T.vs.N	Cytotoxic T cell
-1.87587	1.05147e-211	CTLA4	N.vs.M	Cytotoxic T cell
-1.26298	1.39275e-209	KLRG1	T.vs.N	Cytotoxic T cell
-1.67176	4.73238e-208	HAVCR2	N.vs.M	Cytotoxic T cell
-1.29581	2.81208e-205	PRF1	T.vs.N	Cytotoxic T cell
1.40341	3.22161e-205	DEDD2	T.vs.N	Cytotoxic T cell
-1.91998	1.07053e-200	VCAM1	N.vs.M	Cytotoxic T cell
-1.75932	1.70738e-199	CD27	N.vs.M	Cytotoxic T cell
-1.74863	2.64584e-198	HLA.DQA1	N.vs.M	Cytotoxic T cell
-1.86271	6.99053e-197	CACYBP	N.vs.M	Cytotoxic T cell
-1.94556	1.13155e-194	FABP5	N.vs.M	Cytotoxic T cell
-1.81792	1.10608e-191	LAG3	N.vs.M	Cytotoxic T cell
-2.11611	4.85627e-191	HSPD1	N.vs.M	Cytotoxic T cell
-1.34465	8.97539e-186	HLA.DRB1	T.vs.M	Cytotoxic T cell
-1.11516	3.42884e-185	NKG7	T.vs.M	Cytotoxic T cell
-1.55145	1.27331e-183	HSP90AB1	N.vs.M	Cytotoxic T cell
1.19924	3.38656e-183	SOD1	T.vs.N	Cytotoxic T cell
1.26861	4.89752e-180	AHSA1	T.vs.N	Cytotoxic T cell
1.42176	5.19217e-179	MRPL18	T.vs.N	Cytotoxic T cell
-2.07129	3.0135e-178	HSPA1B	N.vs.M	Cytotoxic T cell
-2.37475	1.11008e-176	DNAJB1	N.vs.M	Cytotoxic T cell
1.82575	4.44705e-176	RGS2	T.vs.N	Cytotoxic T cell
1.21762	5.65862e-176	IGLC2	T.vs.N	Cytotoxic T cell
-1.39581	1.65209e-170	PRF1	T.vs.M	Cytotoxic T cell
1.35899	6.46413e-170	CHORDC1	T.vs.N	Cytotoxic T cell
1.42832	5.9807e-168	BAG3	T.vs.N	Cytotoxic T cell
1.63218	8.45483e-167	CD69	T.vs.M	Cytotoxic T cell
-1.36747	1.83626e-166	COTL1	N.vs.M	Cytotoxic T cell
-1.51801	3.52471e-166	HLA.DRB1	N.vs.M	Cytotoxic T cell
-1.17618	2.767e-163	ENTPD1	N.vs.M	Cytotoxic T cell
1.29462	5.25807e-157	PPP1R2	T.vs.N	Cytotoxic T cell
-1.51355	1.68341e-155	DNAJA1	N.vs.M	Cytotoxic T cell
-1.34951	1.4546e-153	HLA.DQA1	T.vs.M	Cytotoxic T cell
1.23296	1.7987e-153	PPP1R15A	T.vs.N	Cytotoxic T cell
1.33468	1.42825e-152	DNAJB4	T.vs.N	Cytotoxic T cell
-1.05176	8.48367e-151	MYO1F	T.vs.N	Cytotoxic T cell
1.29052	1.77688e-150	SQSTM1	T.vs.N	Cytotoxic T cell
1.39196	1.07224e-147	SCGB3A1	T.vs.M	Cytotoxic T cell
1.33332	5.75791e-147	SCGB1A1	N.vs.M	Cytotoxic T cell
1.11267	5.77716e-147	DNAJB6	T.vs.N	Cytotoxic T cell
1.06891	3.4748e-145	DYNLL1	T.vs.N	Cytotoxic T cell
-1.36409	1.00804e-144	CTLA4	T.vs.M	Cytotoxic T cell
1.01649	5.4687e-144	EIF5	T.vs.N	Cytotoxic T cell
-1.10225	6.77055e-143	GZMH	T.vs.N	Cytotoxic T cell
1.70478	6.81657e-143	FGFBP2	N.vs.M	Cytotoxic T cell
1.36671	8.31266e-142	CTSW	T.vs.M	Cytotoxic T cell
-2.81852	2.38945e-141	HSPA6	N.vs.M	Cytotoxic T cell
-1.47223	3.1942e-141	RGS1	N.vs.M	Cytotoxic T cell
-1.45385	1.04279e-138	DUSP4	N.vs.M	Cytotoxic T cell
1.17573	2.76866e-137	CKS2	T.vs.N	Cytotoxic T cell
-1.23909	3.12493e-137	LAG3	T.vs.M	Cytotoxic T cell
1.00627	1.24325e-135	S100A10	N.vs.M	Cytotoxic T cell
1.3503	2.34398e-134	EGR1	T.vs.N	Cytotoxic T cell
1.67129	2.42113e-134	IL7R	N.vs.M	Cytotoxic T cell
-1.26555	5.66523e-133	SOD1	N.vs.M	Cytotoxic T cell
-1.38114	8.5517e-131	TNFRSF9	N.vs.M	Cytotoxic T cell
3.13518	4.42075e-129	CXCL13	T.vs.N	Cytotoxic T cell
1.20912	1.99812e-127	DNAJA4	T.vs.N	Cytotoxic T cell
-1.20577	3.19791e-126	PRRG4	N.vs.M	Cytotoxic T cell
1.18483	2.15829e-124	ZNF331	T.vs.N	Cytotoxic T cell
-1.56478	2.91141e-123	BAG3	N.vs.M	Cytotoxic T cell
1.18149	4.15819e-123	COTL1	T.vs.N	Cytotoxic T cell
1.18052	3.09289e-121	TXNIP	N.vs.M	Cytotoxic T cell
1.40174	2.6295e-119	ATF3	T.vs.N	Cytotoxic T cell
-1.76653	1.77229e-116	RGS2	N.vs.M	Cytotoxic T cell
-1.35067	2.74657e-116	FKBP4	N.vs.M	Cytotoxic T cell
1.2274	7.51498e-116	ANKRD37	T.vs.N	Cytotoxic T cell
-1.061	8.31452e-116	VCAM1	T.vs.M	Cytotoxic T cell
1.64389	1.56944e-113	LMNA	T.vs.M	Cytotoxic T cell
-1.14279	5.53207e-113	PTMS	N.vs.M	Cytotoxic T cell
1.20048	6.9052e-113	PLAC8	N.vs.M	Cytotoxic T cell
-1.03195	3.56613e-112	TYMP	N.vs.M	Cytotoxic T cell
-1.16557	2.67773e-111	HLA.DQB1	N.vs.M	Cytotoxic T cell
-1.0064	3.20965e-111	UBB	N.vs.M	Cytotoxic T cell
-1.19419	2.58544e-110	CHORDC1	N.vs.M	Cytotoxic T cell
1.07577	2.33123e-107	SCGB1A1	T.vs.M	Cytotoxic T cell
1.2091	8.37435e-107	RGCC	T.vs.N	Cytotoxic T cell
1.63238	6.5277e-105	IL7R	T.vs.M	Cytotoxic T cell
1.09746	1.42189e-103	RPS26	T.vs.M	Cytotoxic T cell
1.49427	3.94329e-102	FOS	T.vs.M	Cytotoxic T cell
-1.78081	1.37428e-99	ZFAND2A	N.vs.M	Cytotoxic T cell
-1.1015	4.89303e-99	STIP1	N.vs.M	Cytotoxic T cell
1.15045	7.29613e-97	RBPJ	T.vs.N	Cytotoxic T cell
-1.20187	1.10372e-96	DNAJA4	N.vs.M	Cytotoxic T cell
1.16802	1.84269e-93	DUSP1	T.vs.N	Cytotoxic T cell
1.19002	1.21028e-91	NEU1	T.vs.N	Cytotoxic T cell
1.02871	3.12499e-90	JUNB	T.vs.N	Cytotoxic T cell
-1.04774	1.36469e-87	AHSA1	N.vs.M	Cytotoxic T cell
1.01772	3.37535e-87	SAMSN1	T.vs.N	Cytotoxic T cell
1.11048	3.95668e-86	FOSB	T.vs.M	Cytotoxic T cell
-1.19003	3.0235e-85	ID3	N.vs.M	Cytotoxic T cell
-1.41965	4.43573e-83	JUN	N.vs.M	Cytotoxic T cell
-1.03921	9.03652e-83	GEM	N.vs.M	Cytotoxic T cell
1.85616	1.06954e-82	IFNG	T.vs.N	Cytotoxic T cell
1.02582	7.00324e-82	NR4A1	T.vs.M	Cytotoxic T cell
-1.08533	6.32769e-81	CKS2	N.vs.M	Cytotoxic T cell
-1.042	1.23527e-74	FABP5	T.vs.M	Cytotoxic T cell
1.07236	2.418e-73	EGR1	T.vs.M	Cytotoxic T cell
1.08438	3.22394e-73	TNFRSF9	T.vs.N	Cytotoxic T cell
1.04163	7.10547e-72	PHLDA1	T.vs.N	Cytotoxic T cell
-1.08359	3.59885e-70	DNAJB4	N.vs.M	Cytotoxic T cell
1.16569	2.28028e-69	CMC1	N.vs.M	Cytotoxic T cell
-1.01953	6.19516e-69	GBP2	N.vs.M	Cytotoxic T cell
-1.04169	1.20532e-68	ISG15	N.vs.M	Cytotoxic T cell
-1.00636	1.39547e-67	DEDD2	N.vs.M	Cytotoxic T cell
1.02544	2.88055e-66	GEM	T.vs.N	Cytotoxic T cell
1.00599	6.96503e-66	PMAIP1	T.vs.N	Cytotoxic T cell
-1.49278	1.22426e-65	SERPINH1	N.vs.M	Cytotoxic T cell
-1.05344	5.50321e-64	PPP1R2	N.vs.M	Cytotoxic T cell
-1.07639	5.29814e-59	MRPL18	N.vs.M	Cytotoxic T cell
1.16892	8.04916e-57	FOS	N.vs.M	Cytotoxic T cell
-1.04324	1.50689e-56	FAM3C	N.vs.M	Cytotoxic T cell
-1.16518	1.84206e-55	BIRC3	N.vs.M	Cytotoxic T cell
1.02669	1.86987e-50	LMNA	N.vs.M	Cytotoxic T cell
1.30564	1.88516e-50	KLRB1	N.vs.M	Cytotoxic T cell
1.0241	3.6332e-49	TSC22D1	T.vs.N	Cytotoxic T cell
1.19885	2.27538e-48	CRTAM	T.vs.N	Cytotoxic T cell
1.01804	2.85654e-46	CCL4L2	T.vs.N	Cytotoxic T cell
-1.00081	1.15152e-26	CCL4L2	N.vs.M	Cytotoxic T cell
-1.18473	2.50082e-19	IFNG	N.vs.M	Cytotoxic T cell
-1.03962	1.64644e-10	MT2A	T.vs.M	Cytotoxic T cell
1.2171	8.0429e-43	MT.ATP6	T.vs.M	Regulatory T cell
1.48938	7.66816e-40	IGHA1	T.vs.M	Regulatory T cell
1.01951	9.85651e-26	HSPA1B	T.vs.M	Regulatory T cell
1.36503	9.858e-24	SCGB3A1	T.vs.M	Regulatory T cell
1.16475	1.7059e-18	JUN	T.vs.M	Regulatory T cell
1.14676	6.49237e-15	KLF6	T.vs.M	Regulatory T cell
3.41981	1.22273e-05	HSPA1A	T.vs.N	Regulatory T cell
3.0264	0.000141655	HSPA1B	T.vs.N	Regulatory T cell
2.29128	0.000148903	HSP90AA1	T.vs.N	Regulatory T cell
2.9777	0.000210441	DNAJB1	T.vs.N	Regulatory T cell
2.25252	0.000725375	HSPE1	T.vs.N	Regulatory T cell
1.07426	0.000957439	FOS	T.vs.M	Regulatory T cell
-1.05515	1.70372e-87	RPS27	T.vs.M	B cell
2.07269	1.01851e-75	HSPA8	T.vs.M	B cell
-1.331	2.57921e-72	RPS29	T.vs.M	B cell
2.51805	6.32874e-60	CCR7	T.vs.M	B cell
1.5141	9.68454e-60	H3F3B	T.vs.M	B cell
-1.02299	2.71403e-57	RPL37	T.vs.M	B cell
1.3882	3.23156e-55	HSP90AB1	T.vs.M	B cell
1.57061	7.25345e-55	HSPH1	T.vs.M	B cell
1.551	6.01181e-54	DNAJB6	T.vs.M	B cell
1.27525	1.94789e-52	PNRC1	T.vs.M	B cell
1.48662	2.29964e-52	SQSTM1	T.vs.M	B cell
1.67495	3.10718e-52	YPEL5	T.vs.M	B cell
1.29512	1.6399e-48	DNAJA1	T.vs.M	B cell
1.40488	2.89681e-48	EZR	T.vs.M	B cell
1.48822	3.8539e-48	REL	T.vs.M	B cell
1.36176	4.50939e-47	HSPD1	T.vs.M	B cell
1.16928	3.05141e-46	GPBP1	T.vs.M	B cell
-1.09651	6.42222e-46	RPS21	T.vs.M	B cell
1.78641	1.16066e-45	FKBP4	T.vs.M	B cell
1.46682	1.92505e-44	PMAIP1	T.vs.M	B cell
-1.83425	2.43726e-44	RPS26	T.vs.M	B cell
1.66932	2.89405e-44	ANKRD37	T.vs.M	B cell
1.2132	3.40655e-44	SARAF	T.vs.M	B cell
1.33964	4.13837e-44	PTGES3	T.vs.M	B cell
1.22715	1.27211e-43	DEDD2	T.vs.M	B cell
1.32685	1.81134e-43	CD83	T.vs.M	B cell
1.20232	5.96016e-43	TUBB4B	T.vs.M	B cell
1.26043	9.89262e-42	AHSA1	T.vs.M	B cell
1.5986	4.08314e-41	MCL1	T.vs.M	B cell
1.24507	5.44703e-41	CKS2	T.vs.M	B cell
1.18449	1.26104e-40	HSP90AA1	T.vs.M	B cell
1.24796	5.15905e-40	MRPL18	T.vs.M	B cell
1.15372	7.29745e-40	TUBA1A	T.vs.M	B cell
1.21706	2.74069e-39	SRGN	T.vs.M	B cell
-2.02856	1.57616e-38	AC090498.1	T.vs.M	B cell
1.46388	1.61166e-38	LY9	T.vs.M	B cell
1.01416	2.57912e-38	HLA.DQB1	T.vs.M	B cell
1.35796	1.88253e-36	EIF4A3	T.vs.M	B cell
1.07745	3.68465e-36	TCP1	T.vs.M	B cell
1.20848	4.71927e-36	PPP1R15A	T.vs.M	B cell
1.10288	1.14792e-35	HSPA1B	T.vs.M	B cell
1.13072	1.32582e-35	CD55	T.vs.M	B cell
1.21339	7.51522e-35	HERPUD1	T.vs.M	B cell
1.10166	9.35626e-35	NR4A2	T.vs.M	B cell
1.10973	1.10653e-33	PIM3	T.vs.M	B cell
1.13355	3.22074e-32	CMTM6	T.vs.M	B cell
1.25651	6.72207e-32	CHORDC1	T.vs.M	B cell
1.2425	9.54947e-32	STIP1	T.vs.M	B cell
1.38621	6.64488e-31	TYMP	T.vs.M	B cell
1.25659	1.66627e-30	MARCKSL1	T.vs.M	B cell
1.23783	6.21676e-30	BCL2A1	T.vs.M	B cell
1.07413	1.64694e-28	IRF8	T.vs.M	B cell
-1.69646	1.14358e-27	RPS29	N.vs.M	B cell
1.89054	3.07216e-27	HSP90AA1	T.vs.N	B cell
1.96916	3.78519e-27	HSPE1	T.vs.N	B cell
-1.09092	1.60691e-26	RPS27	N.vs.M	B cell
1.12937	4.50629e-26	BCAS2	T.vs.M	B cell
1.62657	1.41374e-25	HSP90AB1	T.vs.N	B cell
2.49931	1.72151e-25	IGHM	N.vs.M	B cell
1.19397	7.75775e-25	CD69	T.vs.M	B cell
-1.04825	1.49746e-24	RPL41	N.vs.M	B cell
2.06223	2.96529e-24	HSPD1	T.vs.N	B cell
1.24624	3.03495e-24	IGHM	T.vs.M	B cell
1.93517	6.69006e-24	HSPH1	T.vs.N	B cell
1.0941	2.39796e-23	ELL2	T.vs.M	B cell
1.62728	2.81582e-22	HSPA8	T.vs.N	B cell
1.7286	1.53694e-21	HLA.DQA2	N.vs.M	B cell
1.26125	2.2562e-21	LMNA	T.vs.M	B cell
1.86815	3.01067e-21	IGHA1	T.vs.N	B cell
1.0887	2.4969e-20	NFKB1	T.vs.M	B cell
1.27715	2.87467e-20	RGCC	T.vs.M	B cell
1.53063	3.46973e-20	DNAJA1	T.vs.N	B cell
1.27514	6.50886e-19	HLA.DQA2	T.vs.M	B cell
-1.09134	2.81823e-17	RPL37	N.vs.M	B cell
1.08066	2.83979e-17	SCGB3A1	T.vs.M	B cell
1.16103	2.0667e-16	SARAF	N.vs.M	B cell
1.03295	2.78616e-16	HLA.DRA	N.vs.M	B cell
1.41656	4.30432e-16	ZFP36L2	N.vs.M	B cell
-2.59269	7.72482e-16	AC090498.1	N.vs.M	B cell
1.03629	1.29703e-15	HLA.DQB1	N.vs.M	B cell
1.49813	1.76685e-15	HSPA1B	T.vs.N	B cell
1.10971	4.0314e-14	RPS4Y1	T.vs.M	B cell
-1.06508	6.33275e-14	CD79A	T.vs.N	B cell
1.55079	2.55753e-13	MRPL18	T.vs.N	B cell
1.1447	1.3417e-12	SNX2	N.vs.M	B cell
-1.09231	3.41749e-12	RPS21	N.vs.M	B cell
1.28991	4.46815e-12	HLA.DRB5	N.vs.M	B cell
1.31307	4.76874e-12	MCL1	N.vs.M	B cell
1.00443	1.74191e-11	BTG1	N.vs.M	B cell
1.36314	2.07833e-11	DNAJB6	T.vs.N	B cell
1.00349	6.30385e-11	CD55	N.vs.M	B cell
1.24078	9.49742e-11	AHSA1	T.vs.N	B cell
1.24872	1.04661e-10	TUBB4B	T.vs.N	B cell
1.39931	1.12842e-10	FKBP4	T.vs.N	B cell
-1.54932	1.60997e-10	RPS26	N.vs.M	B cell
1.02035	2.35156e-10	IRF8	N.vs.M	B cell
1.52044	2.73965e-10	CHORDC1	T.vs.N	B cell
1.40786	1.3343e-09	ANKRD37	T.vs.N	B cell
-1.27783	2.03275e-09	NBEAL1	T.vs.M	B cell
-1.25307	3.09492e-09	IGHM	T.vs.N	B cell
1.06453	3.79507e-09	YPEL5	N.vs.M	B cell
1.13635	6.19546e-09	DEDD2	T.vs.N	B cell
1.04968	7.64646e-09	CD79A	N.vs.M	B cell
1.05214	1.27754e-08	PHACTR1	N.vs.M	B cell
1.00929	1.40478e-08	REL	T.vs.N	B cell
1.11477	1.54735e-08	STIP1	T.vs.N	B cell
1.56184	8.81301e-08	CCR7	T.vs.N	B cell
1.21528	1.07203e-07	SQSTM1	T.vs.N	B cell
1.05617	7.38516e-07	PTGES3	T.vs.N	B cell
1.04389	1.75437e-06	DNAJB4	T.vs.N	B cell
-1.16508	6.72199e-06	CD79B	T.vs.N	B cell
1.00261	0.00026584	SMIM14	T.vs.N	B cell
1.68834	6.03504e-124	IGHA1	T.vs.N	NK cell
2.21455	1.48617e-110	IGKC	T.vs.N	NK cell
-2.41927	2.51657e-51	IGKC	N.vs.M	NK cell
2.08268	3.79431e-12	HSPA1A	T.vs.N	NK cell
1.71637	2.49857e-06	HSP90AA1	T.vs.N	NK cell
1.69796	3.4136e-06	HSPA1B	T.vs.N	NK cell
-1.37227	9.98245e-06	RPS4Y1	T.vs.N	NK cell
1.8752	1.92246e-05	JUN	T.vs.N	NK cell
-1.21899	5.89848e-05	SCGB1A1	T.vs.N	NK cell
1.75957	0.000109891	DNAJB1	T.vs.N	NK cell
-1.15155	1.03723e-06	ACTB	T.vs.N	Plasma cell
-1.19821	4.95705e-06	ITM2C	T.vs.N	Plasma cell
1.55636	2.73603e-05	NR4A3	T.vs.N	Plasma cell
1.39172	4.84713e-05	REL	T.vs.N	Plasma cell
1.30735	0.000171723	GPR183	T.vs.N	Plasma cell
-1.01816	0.000771934	ARPC1B	T.vs.N	Plasma cell
-1.63574	1.16522e-114	IGKC	N.vs.M	M1 macrophage
3.046	5.39584e-104	IGKC	T.vs.N	M1 macrophage
1.52314	3.91419e-99	IGHA1	T.vs.N	M1 macrophage
1.43384	1.00263e-29	LST1	N.vs.M	M1 macrophage
1.7752	1.48668e-27	SCGB1A1	N.vs.M	M1 macrophage
-1.05666	3.78522e-26	XIST	N.vs.M	M1 macrophage
-1.35504	1.10153e-25	SCGB1A1	T.vs.N	M1 macrophage
1.28259	5.76815e-24	ASAH1	N.vs.M	M1 macrophage
1.66041	4.59247e-23	NAP1L1	N.vs.M	M1 macrophage
-1.30586	6.55041e-23	LYZ	N.vs.M	M1 macrophage
1.19276	2.3305e-22	CD37	N.vs.M	M1 macrophage
1.01926	1.6694e-19	COTL1	N.vs.M	M1 macrophage
-1.28625	6.3428e-19	MIF	N.vs.M	M1 macrophage
1.3136	7.62004e-19	CD55	N.vs.M	M1 macrophage
1.09425	1.73534e-18	ITM2B	N.vs.M	M1 macrophage
1.30835	3.71732e-16	STXBP2	N.vs.M	M1 macrophage
1.46692	2.9225e-15	TSC22D3	N.vs.M	M1 macrophage
-1.26564	1.00074e-14	RPS4Y1	T.vs.N	M1 macrophage
1.06855	2.42897e-14	SFTPC	N.vs.M	M1 macrophage
1.24411	1.20643e-12	PAG1	N.vs.M	M1 macrophage
1.26489	4.6537e-12	OLR1	T.vs.N	M1 macrophage
-1.12864	4.68279e-12	SOD2	N.vs.M	M1 macrophage
1.06077	1.26864e-11	CFD	N.vs.M	M1 macrophage
1.29386	2.14464e-11	RPS4Y1	N.vs.M	M1 macrophage
-2.31301	3.162e-11	CXCL8	N.vs.M	M1 macrophage
2.08952	3.61675e-11	FCGR3A	N.vs.M	M1 macrophage
1.13188	5.93156e-11	MTSS1	N.vs.M	M1 macrophage
1.21361	3.22259e-10	LINC01272	N.vs.M	M1 macrophage
-1.01498	3.64472e-10	PPIF	N.vs.M	M1 macrophage
1.06713	6.7371e-10	ZFAND5	N.vs.M	M1 macrophage
1.0159	1.67644e-09	SPN	N.vs.M	M1 macrophage
1.02613	3.66624e-09	POU2F2	N.vs.M	M1 macrophage
1.01305	3.97739e-09	FAM65B	N.vs.M	M1 macrophage
1.13217	7.65785e-09	GPR183	T.vs.N	M1 macrophage
-1.0532	1.03879e-08	TYMP	T.vs.M	M1 macrophage
1.07206	6.75713e-08	CDKN1C	N.vs.M	M1 macrophage
1.22563	1.39473e-07	MS4A7	N.vs.M	M1 macrophage
1.034	2.12313e-07	NAAA	N.vs.M	M1 macrophage
-1.15184	2.16013e-06	FCGR3A	T.vs.N	M1 macrophage
1.1184	5.6326e-06	CXCR4	N.vs.M	M1 macrophage
1.12625	3.49395e-05	HSPA1A	T.vs.N	M1 macrophage
1.01843	5.30427e-05	HSPB1	T.vs.N	M1 macrophage
1.12106	6.05921e-05	CD55	T.vs.M	M1 macrophage
-1.19801	0.000321602	CXCL2	N.vs.M	M1 macrophage
-2.88965	0.000466886	HSPB1	N.vs.M	M1 macrophage
3.20346	1.53495e-175	IGKC	T.vs.N	M2 macrophage
2.05886	2.59989e-166	IGHA1	T.vs.N	M2 macrophage
1.60351	1.36493e-33	LIPA	T.vs.N	M2 macrophage
-1.46271	6.9398e-32	CRIP1	T.vs.N	M2 macrophage
1.45762	3.50991e-28	HLA.DQA1	T.vs.N	M2 macrophage
-1.31241	1.97332e-26	RGCC	T.vs.N	M2 macrophage
1.37402	8.12531e-26	HLA.DRB5	T.vs.N	M2 macrophage
-1.32388	8.23427e-24	LMNA	T.vs.N	M2 macrophage
-1.1014	2.01415e-23	RPS26	T.vs.N	M2 macrophage
-1.97169	1.3525e-20	MT2A	T.vs.N	M2 macrophage
1.20302	6.03969e-19	TREM2	T.vs.N	M2 macrophage
-1.62821	2.71038e-18	CXCL3	T.vs.N	M2 macrophage
-1.31733	5.12475e-18	MTRNR2L1	T.vs.N	M2 macrophage
-1.00721	7.39696e-16	UBC	T.vs.N	M2 macrophage
-1.22061	1.89216e-15	SERTAD1	T.vs.N	M2 macrophage
-1.01405	1.62036e-12	MRPL18	T.vs.N	M2 macrophage
-1.16231	6.58462e-12	CES1	T.vs.N	M2 macrophage
-1.61208	5.04997e-11	CCL20	T.vs.N	M2 macrophage
-1.33864	1.27764e-10	IL1B	T.vs.N	M2 macrophage
-1.01631	4.72754e-10	CXCL8	T.vs.N	M2 macrophage
-1.08112	1.12338e-09	PHLDA2	T.vs.N	M2 macrophage
-1.02195	2.42007e-09	CKS2	T.vs.N	M2 macrophage
-1.58189	1.30678e-08	CCL4	T.vs.N	M2 macrophage
-1.07834	1.63764e-08	HSPH1	T.vs.N	M2 macrophage
-1.65991	1.29591e-07	MT1E	T.vs.N	M2 macrophage
-1.39139	4.85647e-07	MT1G	T.vs.N	M2 macrophage
1.05502	2.88504e-06	LYZ	T.vs.N	M2 macrophage
-1.16932	0.000232628	MT1X	T.vs.N	M2 macrophage
