# Supplementary material for: Heterogeneity of tumor immune microenvironment in malignant and metastatic change in LUAD is revealed by single-cell RNA sequencing
Source: Aging (Albany NY). 2023 Jun 16;15(12):5339–54. doi: 10.18632/aging.204752 (PMC10333068; doi:10.18632/aging.204752)
Supplement: Supplementary Table 3 [file aging-15-204752-s003.xlsx]

## Sheet: Sheet1
Supplementary Table 3. Survival analysis of all the marker genes.
gene	pvalue	celltype
CCL20	0.000480005	M2 macrophage
TPI1	0.000529223	Pericyte
CHRNA5	0.00154	Epithelial cell
GAPDH	0.00178137	Epithelial cell
GAPDH	0.00178137	Monocyte
GAPDH	0.00178137	Fibroblast
ERO1B	0.001931	Epithelial cell
CLIC6	0.00665379	Epithelial cell
CD79A	0.00673772	B cell
TCN1	0.00846322	Epithelial cell
KLK11	0.00911943	Epithelial cell
COL1A1	0.0164934	Mesenchymal progenitors
CA9	0.0217402	Epithelial cell
CYP4B1	0.0235841	Epithelial cell
BCAM	0.0238456	Epithelial cell
EFHC1	0.02524	Epithelial cell
KRT17	0.0255921	Epithelial cell
TAC4	0.0273419	Epithelial cell
ZNF90	0.0294212	Helper T cell
ZNF90	0.0294212	Monocyte
SEC61G	0.0375824	Epithelial cell
KLRG1	0.0377566	Cytotoxic T cell
SAMSN1	0.0417163	Cytotoxic T cell
HOPX	0.0442659	Epithelial cell
HOPX	0.0442659	Pericyte
PSCA	0.0464933	Epithelial cell
FKBP4	0.0468864	Memory T cell
FKBP4	0.0468864	Helper T cell
FKBP4	0.0468864	Cytotoxic T cell
FKBP4	0.0468864	B cell
POSTN	0.0470356	Mesenchymal progenitors
S100P	0.0472712	Epithelial cell
CD27	0.052997	Cytotoxic T cell
MTRNR2L1	0.053679	M2 macrophage
CXCL8	0.055711	Monocyte
CXCL8	0.055711	M1 macrophage
CXCL8	0.055711	M2 macrophage
SLC18A2	0.0559606	MAST
UQCRHL	0.056493	Monocyte
RGS13	0.0565962	MAST
NPC2	0.0569491	Pericyte
NPC2	0.0569491	Fibroblast
KLRB1	0.0571267	Cytotoxic T cell
ANKRD29	0.0572241	Epithelial cell
NME4	0.0590868	Epithelial cell
SLC34A2	0.0622405	Epithelial cell
VAMP5	0.0638693	Epithelial cell
COL4A1	0.0648245	Endothelial cell
MTRNR2L12	0.0649912	Epithelial cell
MUC5B	0.0683064	Epithelial cell
FTH1	0.0685024	Epithelial cell
FTH1	0.0685024	Helper T cell
FTH1	0.0685024	Fibroblast
TFF1	0.0718231	Epithelial cell
CD79B	0.0723586	B cell
POLR3H	0.0730017	Epithelial cell
KRT18	0.0737324	Pericyte
SFTPC	0.0757269	Epithelial cell
SFTPC	0.0757269	Dentritic cell
SFTPC	0.0757269	M1 macrophage
PHLDA2	0.0769837	Epithelial cell
PHLDA2	0.0769837	M2 macrophage
RNASE1	0.0787466	Monocyte
CD1B	0.079344	Dentritic cell
PBXIP1	0.0799551	Epithelial cell
PBXIP1	0.0799551	Helper T cell
HSPD1	0.0800018	Memory T cell
HSPD1	0.0800018	Epithelial cell
HSPD1	0.0800018	Pericyte
HSPD1	0.0800018	Cytotoxic T cell
HSPD1	0.0800018	B cell
PEBP1	0.0815552	Epithelial cell
PEBP1	0.0815552	Pericyte
KRT8	0.0825564	Pericyte
PLAUR	0.082886	Epithelial cell
S100B	0.0844422	Dentritic cell
LAMB3	0.0852503	Epithelial cell
SFTA2	0.0853198	Pericyte
PERP	0.0889596	Epithelial cell
LUM	0.092175	Mesenchymal progenitors
MIF	0.0929351	Epithelial cell
MIF	0.0929351	Monocyte
MIF	0.0929351	Fibroblast
MIF	0.0929351	M1 macrophage
RPL22L1	0.0932049	Pericyte
MS4A2	0.0935705	MAST
HSD17B13	0.0953747	Epithelial cell
CAPS	0.0974003	Epithelial cell
N4BP2L2	0.0979654	Epithelial cell
CKS2	0.100899	Cytotoxic T cell
CKS2	0.100899	B cell
CKS2	0.100899	M2 macrophage
MT1X	0.104038	Helper T cell
MT1X	0.104038	M2 macrophage
COL1A2	0.106551	Mesenchymal progenitors
PHLDA1	0.107472	Cytotoxic T cell
KLF4	0.108822	Epithelial cell
KLF4	0.108822	Monocyte
KLF4	0.108822	Dentritic cell
HSD17B6	0.111197	Epithelial cell
ALDOA	0.113221	Pericyte
RHOBTB3	0.113687	Epithelial cell
SUSD2	0.115056	Epithelial cell
AGER	0.116171	Epithelial cell
MUC5AC	0.121384	Epithelial cell
SERPINF1	0.122599	Epithelial cell
PGC	0.123542	Epithelial cell
PGC	0.123542	Pericyte
FGFBP2	0.124825	Cytotoxic T cell
UBC	0.124845	Helper T cell
UBC	0.124845	Monocyte
UBC	0.124845	Cytotoxic T cell
UBC	0.124845	M2 macrophage
BIRC3	0.125392	Epithelial cell
BIRC3	0.125392	Cytotoxic T cell
S100A8	0.129413	Monocyte
TFF3	0.129812	Epithelial cell
PEBP4	0.130232	Epithelial cell
PLIN2	0.134832	Helper T cell
LPIN2	0.135379	Epithelial cell
SERPINH1	0.137364	Memory T cell
SERPINH1	0.137364	Helper T cell
SERPINH1	0.137364	Monocyte
SERPINH1	0.137364	Cytotoxic T cell
GBP2	0.139922	Cytotoxic T cell
MRPL18	0.14013	Cytotoxic T cell
MRPL18	0.14013	B cell
MRPL18	0.14013	M2 macrophage
SPN	0.140256	M1 macrophage
DEDD2	0.141357	Memory T cell
DEDD2	0.141357	Cytotoxic T cell
DEDD2	0.141357	B cell
AREG	0.141616	Epithelial cell
CXCR4	0.143026	Dentritic cell
CXCR4	0.143026	M1 macrophage
ARPC1B	0.14336	Fibroblast
ARPC1B	0.14336	Plasma cell
LMNA	0.144484	Memory T cell
LMNA	0.144484	Helper T cell
LMNA	0.144484	MAST
LMNA	0.144484	Monocyte
LMNA	0.144484	Fibroblast
LMNA	0.144484	Dentritic cell
LMNA	0.144484	Cytotoxic T cell
LMNA	0.144484	B cell
LMNA	0.144484	M2 macrophage
RBPJ	0.144995	Cytotoxic T cell
GPX2	0.145719	Epithelial cell
TIMP3	0.145921	Epithelial cell
POU2F2	0.146039	M1 macrophage
SPTSSA	0.147603	Epithelial cell
HSPA1B	0.150232	Memory T cell
HSPA1B	0.150232	MAST
HSPA1B	0.150232	Cytotoxic T cell
HSPA1B	0.150232	Regulatory T cell
HSPA1B	0.150232	B cell
HSPA1B	0.150232	NK cell
LY9	0.151712	B cell
TMSB10	0.153017	Epithelial cell
CTLA4	0.153534	Cytotoxic T cell
PCSK2	0.155801	Epithelial cell
SLC16A14	0.158089	Epithelial cell
EZR	0.15819	Helper T cell
EZR	0.15819	Monocyte
EZR	0.15819	B cell
TFPI2	0.162038	Epithelial cell
DAPK2	0.163317	Epithelial cell
RPL15	0.163338	Epithelial cell
TFPI	0.164043	Epithelial cell
WFDC2	0.167741	Epithelial cell
WFDC2	0.167741	Pericyte
ITM2B	0.16916	Endothelial cell
ITM2B	0.16916	Fibroblast
ITM2B	0.16916	M1 macrophage
MS4A8	0.170219	Epithelial cell
ADRB2	0.174305	Epithelial cell
HSPE1	0.176513	Memory T cell
HSPE1	0.176513	Epithelial cell
HSPE1	0.176513	Pericyte
HSPE1	0.176513	Cytotoxic T cell
HSPE1	0.176513	Regulatory T cell
HSPE1	0.176513	B cell
COTL1	0.178505	Cytotoxic T cell
COTL1	0.178505	M1 macrophage
MTSS1	0.179793	M1 macrophage
TUBA1B	0.181566	Helper T cell
TUBA1B	0.181566	MAST
ACKR1	0.183305	Endothelial cell
EIF4A3	0.186493	B cell
MSMB	0.18694	Epithelial cell
TXN	0.186996	Epithelial cell
MGP	0.189052	Endothelial cell
FCGR2B	0.191316	Dentritic cell
NAAA	0.191618	M1 macrophage
AHNAK	0.194309	Epithelial cell
AHNAK	0.194309	Helper T cell
ICAM1	0.194746	Epithelial cell
IGFBP7	0.19492	Epithelial cell
IGFBP7	0.19492	Endothelial cell
CD1E	0.197474	Dentritic cell
MGLL	0.197753	Epithelial cell
TFF2	0.200741	Epithelial cell
COL5A2	0.201192	Mesenchymal progenitors
SFTPB	0.20239	Pericyte
PMAIP1	0.202924	Cytotoxic T cell
PMAIP1	0.202924	B cell
PDLIM2	0.203855	Epithelial cell
MUC13	0.20496	Epithelial cell
CPE	0.20711	Epithelial cell
IL32	0.209192	Epithelial cell
NEU1	0.209484	Cytotoxic T cell
CCR7	0.211233	B cell
MT2A	0.211544	Memory T cell
MT2A	0.211544	Cytotoxic T cell
MT2A	0.211544	M2 macrophage
PPP1R14B	0.214849	Epithelial cell
DNAJB4	0.215864	MAST
DNAJB4	0.215864	Cytotoxic T cell
DNAJB4	0.215864	B cell
CTSZ	0.217778	Epithelial cell
CTSZ	0.217778	Monocyte
MARCKS	0.223914	Monocyte
SPINK1	0.224624	Epithelial cell
AQP4	0.225466	Epithelial cell
RPS27	0.226257	Epithelial cell
RPS27	0.226257	Helper T cell
RPS27	0.226257	MAST
RPS27	0.226257	Fibroblast
RPS27	0.226257	Mesenchymal progenitors
RPS27	0.226257	Dentritic cell
RPS27	0.226257	B cell
MMP11	0.227103	Mesenchymal progenitors
CYB5A	0.228115	Pericyte
SLC25A5	0.228815	Epithelial cell
COL3A1	0.229594	Mesenchymal progenitors
HSPA8	0.23063	Memory T cell
HSPA8	0.23063	Helper T cell
HSPA8	0.23063	MAST
HSPA8	0.23063	Cytotoxic T cell
HSPA8	0.23063	B cell
DST	0.231333	Epithelial cell
ACTB	0.234862	Fibroblast
ACTB	0.234862	Plasma cell
NDUFB1	0.236072	Monocyte
TUBA4A	0.236156	Memory T cell
HSP90AA1	0.238446	Memory T cell
HSP90AA1	0.238446	Pericyte
HSP90AA1	0.238446	Dentritic cell
HSP90AA1	0.238446	Cytotoxic T cell
HSP90AA1	0.238446	Regulatory T cell
HSP90AA1	0.238446	B cell
HSP90AA1	0.238446	NK cell
ANKRD37	0.238756	Memory T cell
ANKRD37	0.238756	Cytotoxic T cell
ANKRD37	0.238756	B cell
FASN	0.243486	Epithelial cell
PHACTR1	0.246531	B cell
CST6	0.247786	Epithelial cell
HERPUD1	0.250304	B cell
CD69	0.250411	Cytotoxic T cell
CD69	0.250411	B cell
SNTN	0.251859	Epithelial cell
FABP4	0.252635	Helper T cell
FABP4	0.252635	Fibroblast
DNAJB6	0.255748	Memory T cell
DNAJB6	0.255748	Cytotoxic T cell
DNAJB6	0.255748	B cell
PLA2G1B	0.256195	Epithelial cell
TCP1	0.257124	B cell
C1QB	0.259915	Helper T cell
PRELID3B	0.260644	Epithelial cell
RPL36A	0.261321	Epithelial cell
RPL36A	0.261321	Helper T cell
RPL36A	0.261321	Monocyte
PPP1R15A	0.26294	Helper T cell
PPP1R15A	0.26294	Cytotoxic T cell
PPP1R15A	0.26294	B cell
CRELD2	0.263421	Epithelial cell
PTP4A1	0.267602	Epithelial cell
CDKN1C	0.268246	M1 macrophage
FSTL3	0.270268	Epithelial cell
TNNC1	0.27258	Epithelial cell
VMO1	0.273789	Epithelial cell
RGS2	0.274838	Fibroblast
RGS2	0.274838	Cytotoxic T cell
CADM1	0.275252	Epithelial cell
C4BPA	0.275581	Epithelial cell
FAM167B	0.276272	Endothelial cell
SLC2A3	0.278012	Epithelial cell
ENTPD1	0.280199	Cytotoxic T cell
IGHM	0.282772	B cell
NR4A2	0.284767	B cell
KLF2	0.28696	Monocyte
ID2	0.28778	Epithelial cell
TUBB4B	0.288369	Epithelial cell
TUBB4B	0.288369	B cell
ACTG1	0.288467	Pericyte
COL4A3	0.29191	Epithelial cell
NCKAP5	0.29201	Epithelial cell
DUSP23	0.292038	Endothelial cell
BNIP3	0.29316	Epithelial cell
DDX21	0.295186	Pericyte
SCGB1A1	0.298328	Memory T cell
SCGB1A1	0.298328	Epithelial cell
SCGB1A1	0.298328	Helper T cell
SCGB1A1	0.298328	Pericyte
SCGB1A1	0.298328	Dentritic cell
SCGB1A1	0.298328	Cytotoxic T cell
SCGB1A1	0.298328	NK cell
SCGB1A1	0.298328	M1 macrophage
THBS2	0.299234	Mesenchymal progenitors
UQCRQ	0.299945	Epithelial cell
UQCRQ	0.299945	Endothelial cell
MS4A7	0.300128	M1 macrophage
CREM	0.301961	MAST
CD9	0.304326	Epithelial cell
CD9	0.304326	Monocyte
TSPAN8	0.306612	Epithelial cell
CTSS	0.307612	Epithelial cell
CTSS	0.307612	Monocyte
FABP6	0.307929	Epithelial cell
ANXA3	0.308223	Epithelial cell
MAFB	0.311475	Monocyte
EPHX1	0.314177	Epithelial cell
KRT7	0.31437	Epithelial cell
KRT7	0.31437	Pericyte
SFRP2	0.316355	Mesenchymal progenitors
IGFBP6	0.31651	Epithelial cell
LRRK2	0.31828	Epithelial cell
S100A11	0.319363	Epithelial cell
TNFRSF12A	0.320379	Epithelial cell
HSP90B1	0.321007	Epithelial cell
SLC12A2	0.321173	Epithelial cell
TMEM176B	0.323257	MAST
TMEM176B	0.323257	Monocyte
CD74	0.323566	Epithelial cell
CD74	0.323566	Monocyte
CD74	0.323566	Fibroblast
ATP2A2	0.324845	Epithelial cell
DNAJB1	0.325214	Memory T cell
DNAJB1	0.325214	Cytotoxic T cell
DNAJB1	0.325214	Regulatory T cell
DNAJB1	0.325214	NK cell
CRTAM	0.328284	Cytotoxic T cell
S100A4	0.329248	Epithelial cell
S100A4	0.329248	Helper T cell
S100A4	0.329248	Endothelial cell
S100A4	0.329248	Fibroblast
S100A4	0.329248	Cytotoxic T cell
RPS12	0.330142	Epithelial cell
FABP5	0.330748	Epithelial cell
FABP5	0.330748	Fibroblast
FABP5	0.330748	Cytotoxic T cell
CRLF1	0.332771	Epithelial cell
PKP1	0.33349	Epithelial cell
TACC1	0.334127	Mesenchymal progenitors
S100A10	0.334659	Epithelial cell
S100A10	0.334659	Helper T cell
S100A10	0.334659	Cytotoxic T cell
CAV2	0.334895	Epithelial cell
DYNLL1	0.335061	Helper T cell
DYNLL1	0.335061	Cytotoxic T cell
NDUFA1	0.336154	Monocyte
IRF8	0.342189	B cell
FAM183A	0.343405	Epithelial cell
CD52	0.345058	Fibroblast
CACYBP	0.347369	Memory T cell
CACYBP	0.347369	Cytotoxic T cell
CD83	0.347452	B cell
IGFBP2	0.348349	Epithelial cell
YPEL5	0.34983	B cell
DBI	0.351243	Epithelial cell
DBI	0.351243	Pericyte
S100A9	0.353836	Epithelial cell
S100A9	0.353836	Monocyte
RGS1	0.356166	Memory T cell
RGS1	0.356166	Monocyte
RGS1	0.356166	Fibroblast
RGS1	0.356166	Cytotoxic T cell
IL7R	0.356671	Endothelial cell
IL7R	0.356671	Monocyte
IL7R	0.356671	Dentritic cell
IL7R	0.356671	Cytotoxic T cell
SFTPD	0.356902	Epithelial cell
APOE	0.359294	Helper T cell
APOE	0.359294	MAST
APOE	0.359294	Monocyte
CDH11	0.359914	Mesenchymal progenitors
RAB11FIP1	0.359936	Epithelial cell
RPS4Y1	0.360387	Epithelial cell
RPS4Y1	0.360387	Helper T cell
RPS4Y1	0.360387	B cell
RPS4Y1	0.360387	NK cell
RPS4Y1	0.360387	M1 macrophage
MFAP4	0.362321	Mesenchymal progenitors
RPS17	0.362717	Fibroblast
TSC22D3	0.362978	Epithelial cell
TSC22D3	0.362978	Helper T cell
TSC22D3	0.362978	MAST
TSC22D3	0.362978	Monocyte
TSC22D3	0.362978	Fibroblast
TSC22D3	0.362978	M1 macrophage
SCEL	0.365496	Epithelial cell
SPRY1	0.366411	Endothelial cell
ANXA4	0.367284	Epithelial cell
COL8A1	0.369984	Epithelial cell
COL8A1	0.369984	Mesenchymal progenitors
RARRES2	0.371914	Epithelial cell
RARRES2	0.371914	Mesenchymal progenitors
CEACAM5	0.373086	Epithelial cell
ALDH2	0.376145	Monocyte
LGALS2	0.37632	Dentritic cell
PSMA7	0.383538	Epithelial cell
PSMA7	0.383538	Pericyte
DUSP4	0.386528	Cytotoxic T cell
IFI27	0.388542	Epithelial cell
IFI27	0.388542	Pericyte
IFI27	0.388542	Endothelial cell
THY1	0.391117	Mesenchymal progenitors
IGHG4	0.391985	Mesenchymal progenitors
CCL13	0.392426	Monocyte
FOSB	0.39302	Cytotoxic T cell
CEACAM6	0.394703	Epithelial cell
AQP3	0.395098	Epithelial cell
ID1	0.395113	Epithelial cell
MUC6	0.396775	Epithelial cell
HSP90AB1	0.398241	Memory T cell
HSP90AB1	0.398241	Pericyte
HSP90AB1	0.398241	Cytotoxic T cell
HSP90AB1	0.398241	B cell
SPOCK2	0.400275	Epithelial cell
SAT1	0.408436	Pericyte
SFTPA1	0.408687	Epithelial cell
HSPH1	0.409353	Memory T cell
HSPH1	0.409353	Cytotoxic T cell
HSPH1	0.409353	B cell
HSPH1	0.409353	M2 macrophage
LGALS1	0.410506	Epithelial cell
LGALS1	0.410506	Fibroblast
CMBL	0.413115	Epithelial cell
CAPSL	0.414922	Epithelial cell
STIP1	0.419134	Cytotoxic T cell
STIP1	0.419134	B cell
CXCL3	0.419385	M2 macrophage
FCGR3A	0.420167	M1 macrophage
MGST3	0.421117	Epithelial cell
MGST3	0.421117	Fibroblast
RAMP1	0.422118	Epithelial cell
TXNRD1	0.422798	Epithelial cell
MAFF	0.423318	Dentritic cell
S100A6	0.425384	Epithelial cell
S100A6	0.425384	Fibroblast
CXCL2	0.427457	M1 macrophage
ELL2	0.427651	B cell
CLPTM1L	0.428902	Epithelial cell
MUC1	0.429119	Epithelial cell
MT1E	0.432112	Epithelial cell
MT1E	0.432112	Endothelial cell
MT1E	0.432112	M2 macrophage
ANXA1	0.432184	Memory T cell
ANXA1	0.432184	Epithelial cell
ANXA1	0.432184	Helper T cell
ANXA1	0.432184	MAST
RTKN2	0.434305	Epithelial cell
CHORDC1	0.436159	Memory T cell
CHORDC1	0.436159	Cytotoxic T cell
CHORDC1	0.436159	B cell
PTMS	0.436688	Cytotoxic T cell
RPS19	0.438392	Epithelial cell
RPS19	0.438392	Endothelial cell
RNASET2	0.43944	Epithelial cell
CES1	0.443353	M2 macrophage
PNISR	0.443918	Epithelial cell
PDIA4	0.446116	Epithelial cell
HSPA6	0.447393	Memory T cell
HSPA6	0.447393	Epithelial cell
HSPA6	0.447393	Helper T cell
HSPA6	0.447393	Cytotoxic T cell
JUN	0.447443	Memory T cell
JUN	0.447443	Helper T cell
JUN	0.447443	Cytotoxic T cell
JUN	0.447443	Regulatory T cell
JUN	0.447443	NK cell
CCL17	0.44984	Dentritic cell
SDCBP	0.450685	Epithelial cell
CHCHD2	0.451176	Pericyte
RSRP1	0.451655	Helper T cell
AHSA1	0.451696	Cytotoxic T cell
AHSA1	0.451696	B cell
XIST	0.453671	Helper T cell
XIST	0.453671	M1 macrophage
BACE2	0.456969	Epithelial cell
LGALS3	0.459431	Epithelial cell
LGALS3	0.459431	Helper T cell
LGALS3	0.459431	Monocyte
LGALS3	0.459431	Fibroblast
LGALS3	0.459431	Dentritic cell
EVL	0.464388	Fibroblast
IDI1	0.464594	Helper T cell
TGFBI	0.464646	Dentritic cell
TM4SF5	0.464661	Epithelial cell
ARGLU1	0.467452	Epithelial cell
SERTAD1	0.467827	M2 macrophage
PIM3	0.469201	B cell
AKAP12	0.471072	Epithelial cell
CTSC	0.472502	Monocyte
ATP1B1	0.474268	Epithelial cell
BTG1	0.476581	B cell
NFKB1	0.47855	B cell
TM4SF4	0.481177	Epithelial cell
ATP2B1	0.481576	Helper T cell
CA2	0.481796	Epithelial cell
HSPA1A	0.4837	Memory T cell
HSPA1A	0.4837	Epithelial cell
HSPA1A	0.4837	Helper T cell
HSPA1A	0.4837	Cytotoxic T cell
HSPA1A	0.4837	Regulatory T cell
HSPA1A	0.4837	NK cell
HSPA1A	0.4837	M1 macrophage
ZFAND2A	0.48482	MAST
ZFAND2A	0.48482	Cytotoxic T cell
SARAF	0.485683	Helper T cell
SARAF	0.485683	B cell
PDIA3	0.48767	Epithelial cell
ID3	0.487791	Epithelial cell
ID3	0.487791	Cytotoxic T cell
ANXA2	0.488065	Epithelial cell
ANXA2	0.488065	Helper T cell
ANXA2	0.488065	Dentritic cell
COX6B1	0.488895	Epithelial cell
EPAS1	0.492414	Endothelial cell
ALOX5AP	0.493211	Helper T cell
ALOX5AP	0.493211	Monocyte
SFTPA2	0.493641	Epithelial cell
DNAAF1	0.497416	Epithelial cell
NR4A1	0.498002	Memory T cell
NR4A1	0.498002	Epithelial cell
NR4A1	0.498002	Cytotoxic T cell
MYADM	0.499167	Helper T cell
GZMH	0.499649	Cytotoxic T cell
LYZ	0.502039	Epithelial cell
LYZ	0.502039	Helper T cell
LYZ	0.502039	Fibroblast
LYZ	0.502039	M1 macrophage
LYZ	0.502039	M2 macrophage
NUPR1	0.502184	Epithelial cell
NUPR1	0.502184	Monocyte
DYNLT1	0.502582	Epithelial cell
SRSF3	0.506501	Epithelial cell
PCP4	0.506561	Epithelial cell
CYSTM1	0.50667	Epithelial cell
COL10A1	0.507307	Mesenchymal progenitors
ADIRF	0.51212	Epithelial cell
TPPP3	0.512125	Epithelial cell
SPP1	0.5122	Monocyte
ACP5	0.513477	Monocyte
RPL37A	0.513782	Epithelial cell
RPL37A	0.513782	Helper T cell
RPL37A	0.513782	Monocyte
CCL4L2	0.514569	Cytotoxic T cell
SESTD1	0.515464	Epithelial cell
RPS21	0.517038	Epithelial cell
RPS21	0.517038	Helper T cell
RPS21	0.517038	Monocyte
RPS21	0.517038	Fibroblast
RPS21	0.517038	B cell
REL	0.520895	B cell
REL	0.520895	Plasma cell
RBP1	0.521259	Mesenchymal progenitors
FOLR1	0.522465	Epithelial cell
CTHRC1	0.522955	Mesenchymal progenitors
SOD3	0.523515	Epithelial cell
ASAH1	0.524754	M1 macrophage
GYPC	0.524765	Fibroblast
TIMP1	0.527096	Epithelial cell
TIMP1	0.527096	Mesenchymal progenitors
CD37	0.527877	M1 macrophage
DENND3	0.529407	Epithelial cell
HELZ2	0.530348	Epithelial cell
ANKRD28	0.533181	Helper T cell
GKN2	0.533739	Epithelial cell
CXCL13	0.533807	Cytotoxic T cell
LCN2	0.534199	Epithelial cell
PAG1	0.536053	M1 macrophage
PTGES3	0.538164	B cell
IGFBP5	0.538717	Epithelial cell
RPL23A	0.539784	Fibroblast
CAV1	0.540972	Epithelial cell
TYMP	0.544139	Cytotoxic T cell
TYMP	0.544139	B cell
TYMP	0.544139	M1 macrophage
ZNF331	0.547564	Cytotoxic T cell
IGHA1	0.548095	Memory T cell
IGHA1	0.548095	Epithelial cell
IGHA1	0.548095	Helper T cell
IGHA1	0.548095	MAST
IGHA1	0.548095	Monocyte
IGHA1	0.548095	Fibroblast
IGHA1	0.548095	Mesenchymal progenitors
IGHA1	0.548095	Dentritic cell
IGHA1	0.548095	Cytotoxic T cell
IGHA1	0.548095	Regulatory T cell
IGHA1	0.548095	B cell
IGHA1	0.548095	NK cell
IGHA1	0.548095	M1 macrophage
IGHA1	0.548095	M2 macrophage
HBEGF	0.551328	Epithelial cell
TXNDC17	0.552023	Epithelial cell
TXNDC17	0.552023	Pericyte
CD68	0.55366	Fibroblast
ZFP36L1	0.556325	Epithelial cell
HSPG2	0.561025	Endothelial cell
EDN1	0.561956	Epithelial cell
IFT57	0.563439	Epithelial cell
ZMYND10	0.565056	Epithelial cell
VWA1	0.56601	Endothelial cell
RPS16	0.567037	Epithelial cell
MRPS31	0.568979	Epithelial cell
CAT	0.56933	Epithelial cell
IMPA2	0.5701	Epithelial cell
RGS10	0.571424	Fibroblast
ABCC3	0.57324	Epithelial cell
PRF1	0.573357	Cytotoxic T cell
RSPH1	0.573368	Epithelial cell
UGDH	0.573842	Epithelial cell
DNAJA1	0.579252	Memory T cell
DNAJA1	0.579252	MAST
DNAJA1	0.579252	Cytotoxic T cell
DNAJA1	0.579252	B cell
CLDN18	0.580373	Epithelial cell
RPS25	0.582795	Fibroblast
KCNK1	0.58447	Epithelial cell
AKR1C1	0.586011	Epithelial cell
ARHGEF26	0.586432	Epithelial cell
EFNA1	0.586732	Epithelial cell
TPT1	0.587729	Epithelial cell
COMMD6	0.594968	Epithelial cell
SNX2	0.595213	B cell
CARD16	0.596101	Helper T cell
RP1	0.596762	Epithelial cell
RORA	0.597654	Helper T cell
SSR4	0.59895	Epithelial cell
MYO1F	0.59915	Cytotoxic T cell
CPM	0.600726	Epithelial cell
ALPL	0.601004	Epithelial cell
MSLN	0.601895	Epithelial cell
CCL4	0.603635	Memory T cell
CCL4	0.603635	M2 macrophage
ISG15	0.604787	Epithelial cell
ISG15	0.604787	Cytotoxic T cell
RPL41	0.606897	Epithelial cell
RPL41	0.606897	Helper T cell
RPL41	0.606897	Monocyte
RPL41	0.606897	Fibroblast
RPL41	0.606897	Mesenchymal progenitors
RPL41	0.606897	B cell
IGKC	0.611651	Memory T cell
IGKC	0.611651	Epithelial cell
IGKC	0.611651	Helper T cell
IGKC	0.611651	Pericyte
IGKC	0.611651	MAST
IGKC	0.611651	Monocyte
IGKC	0.611651	Fibroblast
IGKC	0.611651	Mesenchymal progenitors
IGKC	0.611651	Dentritic cell
IGKC	0.611651	Cytotoxic T cell
IGKC	0.611651	NK cell
IGKC	0.611651	M1 macrophage
IGKC	0.611651	M2 macrophage
BAG3	0.613441	Dentritic cell
BAG3	0.613441	Cytotoxic T cell
ALDH1A1	0.614552	Epithelial cell
STXBP2	0.615351	M1 macrophage
SCGB3A1	0.615755	Memory T cell
SCGB3A1	0.615755	Epithelial cell
SCGB3A1	0.615755	Helper T cell
SCGB3A1	0.615755	Pericyte
SCGB3A1	0.615755	Monocyte
SCGB3A1	0.615755	Fibroblast
SCGB3A1	0.615755	Mesenchymal progenitors
SCGB3A1	0.615755	Dentritic cell
SCGB3A1	0.615755	Cytotoxic T cell
SCGB3A1	0.615755	Regulatory T cell
SCGB3A1	0.615755	B cell
EEF1D	0.616367	Epithelial cell
RGCC	0.617315	Epithelial cell
RGCC	0.617315	Helper T cell
RGCC	0.617315	Monocyte
RGCC	0.617315	Dentritic cell
RGCC	0.617315	Cytotoxic T cell
RGCC	0.617315	B cell
RGCC	0.617315	M2 macrophage
EMP3	0.622886	Dentritic cell
CD151	0.624009	Epithelial cell
UQCRH	0.627305	Epithelial cell
CLU	0.628946	Epithelial cell
VIM	0.634925	Memory T cell
VIM	0.634925	Epithelial cell
VIM	0.634925	Helper T cell
VIM	0.634925	MAST
VIM	0.634925	Dentritic cell
RPL38	0.636285	Epithelial cell
RPL38	0.636285	Helper T cell
RPL38	0.636285	Monocyte
CMC1	0.637747	Cytotoxic T cell
IFI6	0.643685	Epithelial cell
ATP6V1C2	0.64486	Epithelial cell
MCL1	0.645695	Helper T cell
MCL1	0.645695	B cell
IFITM3	0.647237	Helper T cell
IFITM3	0.647237	Pericyte
IFITM3	0.647237	Mesenchymal progenitors
PLAC8	0.648524	Epithelial cell
PLAC8	0.648524	Dentritic cell
PLAC8	0.648524	Cytotoxic T cell
RPS27L	0.649511	Epithelial cell
ANKRD1	0.650121	Epithelial cell
SOD2	0.652147	Fibroblast
SOD2	0.652147	M1 macrophage
VCAM1	0.653749	Cytotoxic T cell
CMTM6	0.655505	B cell
CIT	0.657221	Epithelial cell
FOS	0.660068	Cytotoxic T cell
FOS	0.660068	Regulatory T cell
RPL34	0.661948	Epithelial cell
CALM2	0.662717	Fibroblast
SLC12A7	0.664271	Epithelial cell
MYL9	0.664999	Epithelial cell
EEF1A2	0.666306	Epithelial cell
CD44	0.66891	Helper T cell
CKLF	0.67046	Dentritic cell
GAS6	0.672757	Epithelial cell
CAPG	0.678675	Fibroblast
SDHA	0.682522	Epithelial cell
TSPAN13	0.683279	Epithelial cell
SERF2	0.683555	Epithelial cell
AGR3	0.688191	Epithelial cell
RPL37	0.689709	Epithelial cell
RPL37	0.689709	Helper T cell
RPL37	0.689709	Monocyte
RPL37	0.689709	Fibroblast
RPL37	0.689709	Mesenchymal progenitors
RPL37	0.689709	B cell
AGR2	0.690782	Epithelial cell
COL6A3	0.691775	Mesenchymal progenitors
ANTXR1	0.694774	Mesenchymal progenitors
CRYAB	0.694805	Epithelial cell
KRT19	0.695259	Epithelial cell
PPP1R2	0.697343	Cytotoxic T cell
PRRX1	0.698404	Mesenchymal progenitors
TTLL7	0.699829	Epithelial cell
RPL31	0.699953	Helper T cell
RPL31	0.699953	Fibroblast
SQSTM1	0.700427	Memory T cell
SQSTM1	0.700427	Helper T cell
SQSTM1	0.700427	Cytotoxic T cell
SQSTM1	0.700427	B cell
EGR1	0.701698	Memory T cell
EGR1	0.701698	Cytotoxic T cell
FXYD3	0.701909	Epithelial cell
EMP2	0.703964	Epithelial cell
PCSK1N	0.705798	Epithelial cell
SH3BGRL3	0.705977	Epithelial cell
PKM	0.708713	Epithelial cell
PKM	0.708713	Pericyte
FTL	0.708934	Epithelial cell
FTL	0.708934	Helper T cell
FTL	0.708934	Monocyte
MTRNR2L8	0.709183	Epithelial cell
NAP1L1	0.709453	M1 macrophage
MALAT1	0.709959	Epithelial cell
C1QA	0.71013	Helper T cell
RPL32	0.711406	Epithelial cell
GNAS	0.712297	Epithelial cell
GNAS	0.712297	Pericyte
CKB	0.712894	Epithelial cell
IFNG	0.713379	Cytotoxic T cell
RPS28	0.714133	Epithelial cell
RPS28	0.714133	Helper T cell
RPS28	0.714133	Fibroblast
PPDPF	0.717025	Epithelial cell
PPDPF	0.717025	Pericyte
TSPO	0.719215	Epithelial cell
ZFP36L2	0.721927	Helper T cell
ZFP36L2	0.721927	Dentritic cell
ZFP36L2	0.721927	B cell
LY6E	0.722666	Epithelial cell
LY6E	0.722666	Pericyte
LY6E	0.722666	Fibroblast
P4HB	0.726438	Epithelial cell
VSIG4	0.727426	Dentritic cell
TMED3	0.730191	Epithelial cell
PTMA	0.7336	Epithelial cell
SMIM22	0.733957	Epithelial cell
ITM2C	0.735589	Epithelial cell
ITM2C	0.735589	Plasma cell
BCL2A1	0.73805	B cell
RPL5	0.738372	Pericyte
MANF	0.73926	Epithelial cell
LGSN	0.740955	Epithelial cell
NENF	0.743451	Epithelial cell
UPK3B	0.750943	Epithelial cell
EIF5	0.752269	Cytotoxic T cell
RPL36	0.755421	Epithelial cell
RPL36	0.755421	Fibroblast
GUK1	0.756407	Epithelial cell
ZFAND5	0.758299	Monocyte
ZFAND5	0.758299	Dentritic cell
ZFAND5	0.758299	M1 macrophage
C1QC	0.759509	Fibroblast
CRIP1	0.759809	Monocyte
CRIP1	0.759809	Fibroblast
CRIP1	0.759809	M2 macrophage
MARCKSL1	0.762944	Epithelial cell
MARCKSL1	0.762944	Endothelial cell
MARCKSL1	0.762944	B cell
PLD3	0.772796	Epithelial cell
CTSE	0.772849	Epithelial cell
IGLC2	0.773071	MAST
IGLC2	0.773071	Monocyte
IGLC2	0.773071	Dentritic cell
IGLC2	0.773071	Cytotoxic T cell
PDCD6	0.778614	Epithelial cell
SOD1	0.779876	Cytotoxic T cell
NELFCD	0.780458	Epithelial cell
RPL39	0.78077	Epithelial cell
RPL39	0.78077	Fibroblast
STK4	0.781191	Helper T cell
GADD45B	0.78164	Epithelial cell
LIPA	0.784435	Monocyte
LIPA	0.784435	M2 macrophage
RPS29	0.785562	Epithelial cell
RPS29	0.785562	Helper T cell
RPS29	0.785562	MAST
RPS29	0.785562	Monocyte
RPS29	0.785562	Fibroblast
RPS29	0.785562	Dentritic cell
RPS29	0.785562	B cell
RAB31	0.786126	Epithelial cell
RPS8	0.790934	Fibroblast
B2M	0.791143	Epithelial cell
B2M	0.791143	Pericyte
REG4	0.791637	Epithelial cell
RPL35A	0.793593	Fibroblast
RPS3A	0.793693	Epithelial cell
PLLP	0.796161	Epithelial cell
AEBP1	0.796437	Mesenchymal progenitors
NBEAL1	0.798864	Helper T cell
NBEAL1	0.798864	Monocyte
NBEAL1	0.798864	B cell
TMEM176A	0.799294	Monocyte
SLPI	0.799353	Pericyte
PLA2G2A	0.799706	Epithelial cell
AQP1	0.800245	Epithelial cell
MT1G	0.800589	Monocyte
MT1G	0.800589	M2 macrophage
SPINK5	0.801071	Epithelial cell
SDR16C5	0.814044	Epithelial cell
BLVRB	0.816223	Epithelial cell
NR4A3	0.816417	Plasma cell
HSPB1	0.82132	Epithelial cell
HSPB1	0.82132	MAST
HSPB1	0.82132	Dentritic cell
HSPB1	0.82132	Cytotoxic T cell
HSPB1	0.82132	M1 macrophage
AKR1C2	0.82431	Epithelial cell
ERP29	0.825563	Epithelial cell
OLR1	0.826284	M1 macrophage
DNAJA4	0.829701	Dentritic cell
DNAJA4	0.829701	Cytotoxic T cell
HMGB3	0.832172	Epithelial cell
STX16	0.836262	Epithelial cell
BST2	0.836813	Epithelial cell
SMIM14	0.838308	B cell
OCIAD2	0.843226	Epithelial cell
NABP1	0.843268	Epithelial cell
FAM217B	0.843774	Epithelial cell
CLIC3	0.844809	Epithelial cell
RPL27	0.847825	Epithelial cell
RPS10	0.84892	Epithelial cell
LAG3	0.850267	Cytotoxic T cell
CP	0.850992	Epithelial cell
FAM3C	0.852282	Cytotoxic T cell
FKBP2	0.852499	Epithelial cell
RPS6	0.852974	Pericyte
UBB	0.854111	Memory T cell
UBB	0.854111	Cytotoxic T cell
DUSP1	0.855149	Epithelial cell
DUSP1	0.855149	Fibroblast
DUSP1	0.855149	Cytotoxic T cell
CXCL16	0.855869	Dentritic cell
TMEM190	0.857247	Epithelial cell
CD55	0.85855	Monocyte
CD55	0.85855	B cell
CD55	0.85855	M1 macrophage
BASP1	0.860701	Epithelial cell
RPS26	0.86479	Helper T cell
RPS26	0.86479	Monocyte
RPS26	0.86479	Fibroblast
RPS26	0.86479	Dentritic cell
RPS26	0.86479	Cytotoxic T cell
RPS26	0.86479	B cell
RPS26	0.86479	M2 macrophage
PLVAP	0.865685	Endothelial cell
IER2	0.866128	MAST
BCAS2	0.86748	B cell
ATF3	0.868098	Cytotoxic T cell
PDLIM1	0.868506	Epithelial cell
RPL18A	0.868607	Epithelial cell
MYL12A	0.869131	Epithelial cell
TUBA1A	0.8698	Memory T cell
TUBA1A	0.8698	Epithelial cell
TUBA1A	0.8698	MAST
TUBA1A	0.8698	B cell
UQCR11	0.870322	Epithelial cell
UQCR11	0.870322	Monocyte
UBL5	0.870786	Helper T cell
RPL22	0.871474	Epithelial cell
SNHG25	0.872015	Monocyte
RPS20	0.880227	Epithelial cell
TYROBP	0.882097	Pericyte
LST1	0.883865	M1 macrophage
IL1B	0.892453	M2 macrophage
RPL17	0.892646	Helper T cell
RPL17	0.892646	Monocyte
TESC	0.895997	Epithelial cell
PIGR	0.898635	Epithelial cell
GPX3	0.899636	Endothelial cell
GPX3	0.899636	Mesenchymal progenitors
MAD1L1	0.900463	Epithelial cell
MMP2	0.903625	Mesenchymal progenitors
CCL18	0.904891	Monocyte
AKAP13	0.906287	Epithelial cell
RASD1	0.910191	Epithelial cell
EFEMP1	0.910899	Epithelial cell
UBA52	0.911173	Epithelial cell
EEF2	0.912687	Helper T cell
GPR183	0.913757	Plasma cell
GPR183	0.913757	M1 macrophage
CEBPD	0.914405	Epithelial cell
HAVCR2	0.915815	Cytotoxic T cell
PRRG4	0.915858	Cytotoxic T cell
GPBP1	0.918126	B cell
MFAP2	0.919893	Mesenchymal progenitors
TACSTD2	0.92597	Dentritic cell
CTSW	0.926906	Cytotoxic T cell
ODC1	0.928457	Epithelial cell
CFD	0.928508	Monocyte
CFD	0.928508	M1 macrophage
PPIF	0.92962	M1 macrophage
ALDH3A1	0.933974	Epithelial cell
TNFRSF9	0.934266	Cytotoxic T cell
SPINK4	0.934749	Epithelial cell
MDK	0.937756	Epithelial cell
MDK	0.937756	Pericyte
OS9	0.938581	Epithelial cell
GPRC5A	0.938977	Epithelial cell
EEF1A1	0.939015	Epithelial cell
RPLP2	0.942777	Epithelial cell
JUNB	0.946111	Cytotoxic T cell
PPP1R14A	0.947098	Mesenchymal progenitors
SDF2L1	0.948248	Epithelial cell
DUSP5	0.949242	Helper T cell
COX7C	0.950605	Helper T cell
NTM	0.950758	Epithelial cell
TXNIP	0.951488	Epithelial cell
TXNIP	0.951488	Cytotoxic T cell
GEM	0.952687	Epithelial cell
GEM	0.952687	Cytotoxic T cell
TREM2	0.955204	Monocyte
TREM2	0.955204	M2 macrophage
EMP1	0.955255	Monocyte
PPIB	0.957912	Epithelial cell
CD14	0.958049	Monocyte
KLF6	0.958286	Epithelial cell
KLF6	0.958286	Helper T cell
KLF6	0.958286	Regulatory T cell
NEAT1	0.959094	Epithelial cell
SLC39A8	0.959452	Epithelial cell
MYO10	0.959741	Epithelial cell
AIF1	0.960064	Fibroblast
AIF1	0.960064	Dentritic cell
TAGLN2	0.960525	Helper T cell
TAGLN2	0.960525	Fibroblast
TAGLN2	0.960525	Dentritic cell
NKG7	0.963965	Cytotoxic T cell
SMCHD1	0.964179	Helper T cell
RPS2	0.966226	Endothelial cell
FAM3B	0.968483	Epithelial cell
CD24	0.97046	Epithelial cell
PNRC1	0.970666	Helper T cell
PNRC1	0.970666	B cell
SRGN	0.973254	B cell
RPS23	0.974913	Epithelial cell
LRRIQ1	0.974983	Epithelial cell
ISLR	0.976021	Mesenchymal progenitors
CITED2	0.976526	Helper T cell
CIRBP	0.977693	Epithelial cell
TSC22D1	0.978066	Cytotoxic T cell
APOC1	0.986678	Epithelial cell
APOC1	0.986678	Helper T cell
APOC1	0.986678	Monocyte
LMO7	0.988469	Epithelial cell
NQO1	0.989709	Epithelial cell
GJA1	0.991316	Epithelial cell
COL9A2	0.991721	Epithelial cell
LGALS4	0.99206	Epithelial cell
VCAN	0.997154	Monocyte
VCAN	0.997154	Mesenchymal progenitors
WFS1	0.997497	Epithelial cell
CNPY2	0.99751	Epithelial cell
LGALS3BP	0.999854	Epithelial cell
